# Supplementary material for: Mutation discovery for Mendelian traits in non-laboratory animals: a review of achievements up to 2012
Source: PubMed Central journal article supplement — Anim Genet. 2013 Dec 26;45(2):157–70. doi: 10.1111/age.12103 (PMC4225684; doi:10.1111/age.12103), 2013-12-26
Supplement: age0045-0157-sd1.pdf [file age0045-0157-sd1.pdf]

**Table S1.** An alphabetical list of Mendelian traits/disorders for which a causal mutation has been reported, up to the end of 2012. Further details (including references) for each entry are available at <http://omia.angis.org.au>. An up-to-date version of this table is available from the "Download" tab on the OMIA home page.

| Trait/disorder                                                         | OMIA number | Species     | Mutated gene symbol | Mutated gene name                                                     |
|------------------------------------------------------------------------|-------------|-------------|---------------------|-----------------------------------------------------------------------|
| Abortion and stillbirth due to mutation in MIMT1                       | 001565      | cattle      | MIMT1               | MER1 repeat containing imprinted transcript 1 (non-protein coding)    |
| Abortion due to haplotype HH1                                          | 000001      | cattle      | APAF1               | apoptotic peptidase activating factor 1                               |
| Abortion due to haplotype JH1                                          | 001697      | cattle      | CWC15               | CWC15 spliceosome-associated protein homolog ( <i>S. cerevisiae</i> ) |
| Abortion due to haplotype MH2                                          | 001828      | cattle      | SLC37A2             | solute carrier family 37 (glycerol-3-phosphate transporter), member 2 |
| Achromatopsia (cone degeneration, hemeralopia), AMAL                   | 001365      | dog         | CNGB3               | cyclic nucleotide gated channel beta 3                                |
| Achromatopsia (cone degeneration, hemeralopia), GSPT                   | 001676      | dog         | CNGB3               | cyclic nucleotide gated channel beta 3                                |
| Achromatopsia-2                                                        | 001481      | sheep       | CNGA3               | cyclic nucleotide gated channel alpha 3                               |
| Acrodermatitis enteropathica                                           | 000593      | cattle      | SLC39A4             | solute carrier family 39 (zinc transporter), member 4                 |
| Adrenal hyperplasia, congenital                                        | 000017      | rabbit      | CYP11A1             | cytochrome P450, family 11, subfamily A, polypeptide 1                |
| Adrenal hyperplasia, congenital, due to 11-beta hydroxylase deficiency | 001661      | cat         | CYP11B1             | cytochrome P450, family 11, subfamily B, polypeptide 1                |
| Alopecia, colour mutant                                                | 000031      | dog         | MLPH                | melanophilin                                                          |
| Analphalipoproteinaemia                                                | 000042      | chicken     | ABCA1               | ATP-binding cassette, sub-family A (ABC1), member 1                   |
| Androgen insensitivity syndrome (AIS)                                  | 000991      | horse       | AR                  | androgen receptor                                                     |
| Anhidrotic ectodermal dysplasia                                        | 000543      | cattle, dog | EDA                 | ectodysplasin A                                                       |
| Arachnomelia, BTA23                                                    | 001541      | cattle      | MOCS1               | molybdenum cofactor synthesis 1                                       |
| Arachnomelia, BTA5                                                     | 000059      | cattle      | SUOX                | sulfite oxidase                                                       |
| Arrhythmogenic right ventricular cardiomyopathy                        | 000878      | dog         | STRN                | striatin, calmodulin binding protein                                  |
| Ataxia, cerebellar                                                     | 000078      | dog         | GRM1                | glutamate receptor, metabotropic 1                                    |
| Ataxia, cerebellar, progressive early-onset                            | 001692      | dog         | SEL1L               | sel-1 suppressor of lin-12-like ( <i>C. elegans</i> )                 |

|                                             |        |                                                                                                             |        |                                                           |
|---------------------------------------------|--------|-------------------------------------------------------------------------------------------------------------|--------|-----------------------------------------------------------|
| Atrichia with papular lesions               | 001348 | Rhesus monkey                                                                                               | HR     | hairless homolog (mouse)                                  |
| Autosomal dominant PRA                      | 001346 | dog                                                                                                         | RHO    | rhodopsin                                                 |
| Axonopathy                                  | 001106 | cattle                                                                                                      | MFN2   | mitofusin 2                                               |
| Barring                                     | 000102 | chicken                                                                                                     | CDKN2B | cyclin-dependent kinase inhibitor 2B (p15, inhibits CDK4) |
| Beta-lactoglobulin, aberrant low expression | 001437 | cattle                                                                                                      | PAEP   | progesterone-associated endometrial protein               |
| Bleeding disorder due to P2RY12 defect      | 001564 | dog                                                                                                         | P2RY12 | purinergic receptor P2Y, G-protein coupled, 12            |
| Blood group system AB                       | 000119 | cat                                                                                                         | CMAH   | cytidine monophospho-N-acetylneuraminic acid hydroxylase  |
| Blood group system ABO                      | 001089 | pig, Japanese macaque, chimpanzee, Rhesus monkey, crab-eating macaque, agile gibbon, common gibbon, siamang | GGTA1  | glycoprotein, alpha-galactosyltransferase 1               |
| Brachycephaly                               | 001551 | dog                                                                                                         | BMP3   | bone morphogenetic protein 3                              |
| Brachyspina                                 | 000151 | cattle                                                                                                      | FANCI  | Fanconi anemia, complementation group I                   |
| C3 deficiency                               | 000155 | dog                                                                                                         | C3     | complement component 3                                    |

|                                             |        |                                                 |          |                                                                           |
|---------------------------------------------|--------|-------------------------------------------------|----------|---------------------------------------------------------------------------|
| Cardiomyopathy and woolly haircoat syndrome | 000161 | cattle                                          | PPP1R13L | protein phosphatase 1, regulatory subunit 13 like                         |
| Cardiomyopathy, dilated                     | 000162 | cattle,<br>dog,<br>turkey,<br>golden<br>hamster | OPA3     | optic atrophy 3 (autosomal recessive, with chorea and spastic paraplegia) |
| Cardiomyopathy, hypertrophic                | 000515 | cat,<br>golden<br>hamster                       | MYBPC3   | myosin binding protein C, cardiac                                         |
| Casein, alpha-S1, reduced concentration     | 000852 | goat                                            | CSN1S1   | casein alpha s1                                                           |
| Casein, alpha-S2, absence                   | 001623 | goat                                            | CSN1S2   | casein alpha s2                                                           |
| Casein, beta, absence of                    | 001424 | goat                                            | CSN2     | casein beta                                                               |
| Cataract, early onset                       | 001758 | dog                                             | HSF4     | heat shock transcription factor 4                                         |
| Cerebellar abiotrophy                       | 000175 | dog, horse                                      | SPTBN2   | spectrin, beta, non-erythrocytic 2                                        |
| Chediak-Higashi syndrome                    | 000185 | cattle,<br>American<br>mink                     | LYST     | lysosomal trafficking regulator                                           |
| Chondrodysplasia                            | 000187 | dog, cattle                                     | FGF4     | fibroblast growth factor 4                                                |
| Chondrodysplasia, Spider lamb               | 001703 | sheep                                           | FGFR3    | fibroblast growth factor receptor 3                                       |
| Chondrodysplasia, Texel                     | 001400 | sheep                                           | SLC13A1  | solute carrier family 13 (sodium/sulfate symporters), member 1            |
| Ciliary dyskinesia, primary                 | 001540 | dog                                             | CCDC39   | coiled-coil domain containing 39                                          |
| Citrullinaemia                              | 000194 | cattle                                          | ASS1     | argininosuccinate synthase 1                                              |
| Coat colour, Himalayan                      | 001497 | American<br>mink                                | TYR      | tyrosinase (oculocutaneous albinism IA)                                   |

Coat colour, agouti

000201 horse, ASIP agouti signaling protein  
cattle, red  
fox,  
sheep,  
cat,  
rabbit,  
dog,  
North  
American  
deer  
mouse,  
leopard,  
Asiatic  
golden cat

Coat colour, albinism

000202 cat, cattle, TYR tyrosinase (oculocutaneous albinism IA)  
rabbit,  
water  
buffalo,  
Japanese  
medaka, ,  
American  
mink,  
humpback  
whale,  
ferret

Coat colour, albinism, oculocutaneous type IV

001821 Japanese SLC45A2 solute carrier family 45, member 2  
medaka

Coat colour, appaloosa

001341 horse TRPM1 transient receptor potential cation channel,  
subfamily M, member 1

|                             |        |                                    |         |                                                                  |
|-----------------------------|--------|------------------------------------|---------|------------------------------------------------------------------|
| Coat colour, brown          | 001249 | cattle,<br>dog, cat,<br>sheep, pig | TYRP1   | tyrosinase-related protein 1                                     |
| Coat colour, champagne      | 001263 | horse                              | SLC36A1 | solute carrier family 36 (proton/amino acid symporter), member 1 |
| Coat colour, colour-sided   | 001576 | cattle                             | KIT     | v-kit Hardy-Zuckerman 4 feline sarcoma viral oncogene homolog    |
| Coat colour, cream dilution | 001344 | horse                              | SLC45A2 | solute carrier family 45, member 2                               |
| Coat colour, dilute         | 000206 | cat                                | MLPH    | melanophilin                                                     |
| Coat colour, dilution       | 001545 | cattle                             | PMEL    | premelanosome protein                                            |
| Coat colour, dominant black | 001416 | dog, gray<br>wolf,<br>coyote       | CBD103  | beta-defensin 103                                                |
| Coat colour, dominant white | 000209 | pig, cattle,<br>horse              | KIT     | v-kit Hardy-Zuckerman 4 feline sarcoma viral oncogene homolog    |

Coat colour, extension

001199 cattle, MC1R melanocortin 1 receptor (alpha melanocyte  
dog, stimulating hormone receptor)  
horse, red  
fox, pig,  
sheep,  
jaguar,  
jaguarundi  
,  
American  
black  
bear,  
woolly  
mammoth  
, cat,  
rabbit,  
Arctic fox,  
rock  
pocket  
mouse,  
oldfield  
mouse,  
gray  
squirrel, ,  
little  
striped  
whiptail,  
water

Coat colour, golden

001433 zebrafish slc24a5 solute carrier family 24, member 5

Coat colour, grey/gray

001356 horse STX17 syntaxin 17

Coat colour, grizzle

001495 dog MC1R melanocortin 1 receptor (alpha melanocyte  
stimulating hormone receptor)

|                                                            |        |                    |         |                                                                                        |
|------------------------------------------------------------|--------|--------------------|---------|----------------------------------------------------------------------------------------|
| Coat colour, harlequin                                     | 001454 | dog                | PSMB7   | proteasome (prosome, macropain) subunit, beta type, 7                                  |
| Coat colour, king                                          | 001721 | cheetah            | Taqpep  | transmembrane aminopeptidase Q                                                         |
| Coat colour, macchiato                                     | 001688 | horse              | MITF    | microphthalmia-associated transcription factor                                         |
| Coat colour, melanistic mask                               | 001590 | dog                | MC1R    | melanocortin 1 receptor (alpha melanocyte stimulating hormone receptor)                |
| Coat colour, merle                                         | 000211 | dog                | PMEL    | premelanosome protein                                                                  |
| Coat colour, patch                                         | 001743 | pig                | KIT     | v-kit Hardy-Zuckerman 4 feline sarcoma viral oncogene homolog                          |
| Coat colour, roan                                          | 001216 | cattle, pig        | KITLG   | KIT ligand                                                                             |
| Coat colour, silver                                        | 001438 | horse, zebrafish   | PMEL17  | melanocyte protein 17 precursor                                                        |
| Coat colour, tabby                                         | 001429 | cat                | Taqpep  | transmembrane aminopeptidase Q                                                         |
| Coat colour, white belt, due to KIT                        | 001745 | pig                | KIT     | v-kit Hardy-Zuckerman 4 feline sarcoma viral oncogene homolog                          |
| Coat colour, white spotting                                | 000214 | dog, cattle, horse | MITF    | microphthalmia-associated transcription factor                                         |
| Coat colour, white spotting, due to KIT                    | 001737 | dog                | KIT     | v-kit Hardy-Zuckerman 4 feline sarcoma viral oncogene homolog                          |
| Collie eye anomaly                                         | 000218 | dog                | NHEJ1   | nonhomologous end-joining factor 1                                                     |
| Colorectal hamartomatous polyposis and ganglioneuromatosis | 001515 | dog                | PTEN    | phosphatase and tensin homolog                                                         |
| Complex vertebral malformation                             | 001340 | cattle             | SLC35A3 | solute carrier family 35 (UDP-N-acetylglucosamine (UDP-GlcNAc) transporter), member A3 |
| Cone-rod dystrophy 3                                       | 001520 | dog                | ADAM9   | ADAM metallopeptidase domain 9                                                         |
| Cone-rod dystrophy 4                                       | 001432 | dog                | RPGRIP1 | retinitis pigmentosa GTPase regulator interacting protein 1                            |
| Cone-rod dystrophy, Standard Wire-haired Dachshund         | 001455 | dog                | NPHP4   | nephronophthisis 4                                                                     |

|                                                                    |        |             |         |                                                                                                                                                          |
|--------------------------------------------------------------------|--------|-------------|---------|----------------------------------------------------------------------------------------------------------------------------------------------------------|
| Congenital keratoconjunctivitis sicca and ichthyosiform dermatosis | 001683 | dog         | FAM83H  | family with sequence similarity 83, member H                                                                                                             |
| Congenital muscular dystonia 1                                     | 001450 | cattle      | ATP2A1  | ATPase, Ca <sup>++</sup> transporting, cardiac muscle, fast twitch 1                                                                                     |
| Congenital muscular dystonia 2                                     | 001451 | cattle      | SLC6A5  | solute carrier family 6 (neurotransmitter transporter, glycine), member 5                                                                                |
| Curly coat                                                         | 000245 | dog         | KRT71   | keratin 71                                                                                                                                               |
| Curly coat, Devon rex                                              | 001581 | cat         | KRT71   | keratin 71                                                                                                                                               |
| Cystic fibrosis                                                    | 001794 | pig, ferret | CFTR    | cystic fibrosis transmembrane conductance regulator (ATP-binding cassette sub-family C, member 7)                                                        |
| Cystinuria, type A                                                 | 000256 | dog         | SLC3A1  | solute carrier family 3 (cystine, dibasic and neutral amino acid transporters, activator of cystine, dibasic and neutral amino acid transport), member 1 |
| Deafness                                                           | 000259 | pig         | MITF    | microphthalmia-associated transcription factor                                                                                                           |
| Deficiency of uridine monophosphate synthase                       | 000262 | cattle      | UMPS    | uridine monophosphate synthetase                                                                                                                         |
| Deficient acetaminophen glucuronidation                            | 001586 | cat         | UGT1A6  | UDP-glucuronosyltransferase 1A6                                                                                                                          |
| Degenerative myelopathy                                            | 000263 | dog         | SOD1    | superoxide dismutase 1, soluble                                                                                                                          |
| Dermoid sinus                                                      | 000272 | dog         | FGF4    | fibroblast growth factor 4                                                                                                                               |
| Dihydropyrimidinase deficiency                                     | 001776 | cat         | DPYS    | dihydropyrimidinase                                                                                                                                      |
| Dominant white with bilateral deafness                             | 001680 | cattle      | MITF    | microphthalmia-associated transcription factor                                                                                                           |
| Dwarfism, Angus                                                    | 001485 | cattle      | PRKG2   | protein kinase, cGMP-dependent, type II                                                                                                                  |
| Dwarfism, Dexter                                                   | 001271 | cattle      | ACAN    | aggrecan                                                                                                                                                 |
| Dwarfism, Schmid metaphyseal chondrodysplasia                      | 001718 | pig         | COL10A1 | collagen, type X, alpha 1                                                                                                                                |
| Dwarfism, growth-hormone deficiency                                | 001473 | cattle      | GH1     | growth hormone 1                                                                                                                                         |
| Dwarfism, pituitary                                                | 000307 | dog         | LHX3    | LIM homeobox 3                                                                                                                                           |
| Dwarfism, proportionate, with inflammatory lesions                 | 001686 | cattle      | RNF11   | ring finger protein 11                                                                                                                                   |
| Dwarfism, sex-linked                                               | 000309 | chicken     | SPP2    | secreted phosphoprotein 2, 24kDa                                                                                                                         |



|                                                    |        |                         |           |                                                                   |
|----------------------------------------------------|--------|-------------------------|-----------|-------------------------------------------------------------------|
| Ear size                                           | 001579 | pig                     | PPARD     | peroxisome proliferator-activated receptor delta                  |
| Early retinal degeneration                         | 001297 | dog                     | STK38L    | serine/threonine kinase 38 like                                   |
| Ectodermal dysplasia                               | 000323 | dog                     | FOXI3     | forkhead box I3                                                   |
| Ehlers-Danlos syndrome                             | 000327 | horse                   | PPIB      | peptidylprolyl isomerase B (cyclophilin B)                        |
| Ehlers-Danlos syndrome, Holstein variant           | 001716 | cattle                  | EPYC      | epiphycan                                                         |
| Ehlers-Danlos syndrome, type VII (Dermatosparaxis) | 000328 | cattle, sheep           | ADAMTS2   | ADAM metalloproteinase with thrombospondin type 1 motif, 2        |
| Elliptocytosis                                     | 001318 | dog                     | SPTB      | spectrin, beta, erythrocytic                                      |
| Epidermolysis bullosa                              | 000340 | cattle                  | KRT5      | keratin 5                                                         |
| Epidermolysis bullosa, dystrophic                  | 000341 | dog, cattle             | COL7A1    | collagen, type VII, alpha 1                                       |
| Epidermolysis bullosa, junctionalis, LAMA3         | 001677 | dog, horse              | LAMA3     | laminin, alpha 3                                                  |
| Epidermolysis bullosa, junctionalis, LAMC2         | 001678 | sheep, horse            | LAMC2     | laminin, gamma 2                                                  |
| Epilepsy                                           | 000344 | chicken                 | LOC430486 | similar to Ca <sup>2+</sup> regulator SV2A                        |
| Epilepsy, benign familial juvenile                 | 001596 | dog                     | LGI2      | leucine-rich repeat LGI family, member 2                          |
| Episodic falling                                   | 001592 | dog                     | BCAN      | brevican                                                          |
| Exercise-induced collapse                          | 001466 | dog                     | DNM1      | dynamamin 1                                                       |
| Factor VII deficiency                              | 000361 | dog                     | F7        | coagulation factor VII (serum prothrombin conversion accelerator) |
| Factor XI deficiency                               | 000363 | cattle, dog             | F11       | coagulation factor XI                                             |
| Feather colour, albinism                           | 000369 | chicken                 | TYR       | tyrosinase (oculocutaneous albinism IA)                           |
| Feather colour, albinism, sex-linked, imperfect    | 000370 | chicken, Japanese quail | SLC45A2   | solute carrier family 45, member 2                                |

|                                    |        |                                                                                                                                                        |        |                                                                         |
|------------------------------------|--------|--------------------------------------------------------------------------------------------------------------------------------------------------------|--------|-------------------------------------------------------------------------|
| Feather colour, bronze             | 001494 | turkey                                                                                                                                                 | MC1R   | melanocortin 1 receptor (alpha melanocyte stimulating hormone receptor) |
| Feather colour, dark brown         | 001569 | chicken                                                                                                                                                | SOX10  | SRY (sex determining region Y)-box 10                                   |
| Feather colour, dominant white     | 000373 | chicken                                                                                                                                                | PMEL   | premelanosome protein                                                   |
| Feather colour, extended black     | 000374 | chicken,<br>red-<br>footed<br>booby,<br>Bananaqui<br>t,<br>helmeted<br>guineafow<br>l,<br>gyrfalcon,<br>Lesser<br>snow<br>goose, , ,<br>brown<br>booby | MC1R   | melanocortin 1 receptor (alpha melanocyte stimulating hormone receptor) |
| Feather colour, extended brown     | 001435 | Japanese<br>quail                                                                                                                                      | MC1R   | melanocortin 1 receptor (alpha melanocyte stimulating hormone receptor) |
| Feather colour, lavender           | 001445 | chicken,<br>Japanese<br>quail                                                                                                                          | MLPH   | melanophilin                                                            |
| Feather colour, panda/dotted white | 000375 | Japanese<br>quail                                                                                                                                      | EDNRB2 | endothelin receptor B subtype 2                                         |
| Feather colour, recessive white    | 001252 | chicken                                                                                                                                                | TYR    | tyrosinase (oculocutaneous albinism IA)                                 |

|                                      |        |                         |              |                                                                       |
|--------------------------------------|--------|-------------------------|--------------|-----------------------------------------------------------------------|
| Feather colour, roux                 | 001322 | Japanese quail          | TYRP1        | tyrosinase-related protein 1                                          |
| Feather colour, silver               | 000915 | chicken, Japanese quail | SLC45A2      | solute carrier family 45, member 2                                    |
| Feather colour, yellow               | 001602 | Japanese quail          | ASIP         | agouti signaling protein                                              |
| Feathering, Z-linked                 | 000380 | chicken                 | PRLR         | prolactin receptor                                                    |
| Fecundity, Belclare, FecX(B)         | 001719 | sheep                   | BMP15        | bone morphogenetic protein 15                                         |
| Fecundity, Booroola, FecB(B)         | 000383 | sheep                   | BMPR1B       | bone morphogenetic protein receptor, type IB                          |
| Fecundity, Embrapa, FecG(E)          | 001559 | sheep                   | GDF9         | growth differentiation factor 9                                       |
| Fecundity, Galway, FecX(G)           | 000384 | sheep                   | BMP15        | bone morphogenetic protein 15                                         |
| Fecundity, Hanna, FecX(H)            | 001350 | sheep                   | BMP15        | bone morphogenetic protein 15                                         |
| Fecundity, High fertility, FecG(H)   | 001801 | sheep                   | GDF9         | growth differentiation factor 9                                       |
| Fecundity, Inverdale, FecX(I)        | 000386 | sheep                   | BMP15        | bone morphogenetic protein 15                                         |
| Fecundity, Lacaune, FecX(L)          | 001357 | sheep                   | BMP15        | bone morphogenetic protein 15                                         |
| Fecundity, Norwegian White Sheep     | 001763 | sheep                   | GDF9         | growth differentiation factor 9                                       |
| Fecundity, Rasa Aragonesa, FecX(R)   | 001800 | sheep                   | BMP15        | bone morphogenetic protein 15                                         |
| Fecundity, Thoka, FecG(T)            | 000385 | sheep                   | GDF9         | growth differentiation factor 9                                       |
| Fecundity, small tail Han            | 001423 | sheep                   | BMPR1B       | bone morphogenetic protein receptor, type IB                          |
| Feet, white                          | 001580 | cat                     | KIT          | v-kit Hardy-Zuckerman 4 feline sarcoma viral oncogene homolog         |
| Foal immunodeficiency syndrome       | 001578 | horse                   | SLC5A3       | solute carrier family 5 (sodium/myo-inositol cotransporter), member 3 |
| Frizzle                              | 000394 | chicken                 | KRT75        | keratin 75                                                            |
| Fucosidosis, alpha                   | 000396 | dog                     | FUCA1        | fucosidase, alpha-L- 1, tissue                                        |
| Furnishings (moustache and eyebrows) | 001531 | dog                     | RSPO2        | R-spondin 2                                                           |
| Gaitedness                           | 001715 | horse                   | LOC100147177 | doublesex- and mab-3-related transcription factor 3-like              |
| Gallbladder mucoceles                | 001524 | dog                     | ATCB4        | ATP-binding cassette, sub-family B (MDR/TAP), member 4                |

|                                      |        |                                |          |                                                                  |
|--------------------------------------|--------|--------------------------------|----------|------------------------------------------------------------------|
| Gangliosidosis, GM1                  | 000402 | cat, dog,<br>sheep             | GLB1     | galactosidase, beta 1                                            |
| Gangliosidosis, GM2, GM2A deficiency | 001427 | cat                            | GM2A     | GM2 ganglioside activator                                        |
| Gangliosidosis, GM2, type I          | 001461 | American<br>flamingo,<br>sheep | HEXA     | Hexosaminidase A (alpha polypeptide)                             |
| Gangliosidosis, GM2, type II         | 001462 | cat, dog                       | HEXB     | hexosaminidase B (beta polypeptide)                              |
| Gastrointestinal stromal tumor       | 001516 | dog                            | KIT      | v-kit Hardy-Zuckerman 4 feline sarcoma viral<br>oncogene homolog |
| Gaucher disease, type I              | 000405 | sheep                          | GBA      | glucosidase, beta, acid                                          |
| Generalized PRA                      | 001521 | dog                            | CCDC66   | coiled-coil domain containing 66                                 |
| Glaucoma                             | 000411 | dog                            | ADAMTS10 | ADAM metalloproteinase with<br>thrombospondin type 1 motif, 10   |
| Glycogen storage disease II          | 000419 | cattle                         | GAA      | glucosidase, alpha; acid                                         |
| Glycogen storage disease IIIa        | 001577 | dog                            | AGL      | amylo-alpha-1, 6-glucosidase, 4-alpha-<br>glucanotransferase     |
| Glycogen storage disease IV          | 000420 | cat, horse                     | GBE1     | glucan (1,4-alpha-), branching enzyme 1                          |
| Glycogen storage disease Ia          | 000418 | dog                            | G6PC     | glucose-6-phosphatase, catalytic subunit                         |
| Glycogen storage disease V           | 001139 | cattle,<br>sheep               | PYGM     | phosphorylase, glycogen, muscle                                  |
| Glycogen storage disease VII         | 000421 | dog                            | PFKM     | phosphofructokinase, muscle                                      |
| Goitre, familial                     | 000424 | cattle,<br>goat                | TG       | thyroglobulin                                                    |
| Golden Retriever PRA 1               | 001572 | dog                            | SLC4A3   | solute carrier family 4, anion exchanger,<br>member 3            |
| Haemophilia A                        | 000437 | dog,<br>sheep,<br>cattle       | F8       | coagulation factor VIII, procoagulant<br>component               |
| Haemophilia B                        | 000438 | cat, dog                       | F9       | coagulation factor IX                                            |
| Hair length                          | 000439 | cat, dog                       | FGF5     | fibroblast growth factor 5                                       |

|                                                        |        |                |         |                                                                                                  |
|--------------------------------------------------------|--------|----------------|---------|--------------------------------------------------------------------------------------------------|
| Henny feathering                                       | 000452 | chicken        | CYP19A1 | cytochrome P450, family 19, subfamily A, polypeptide 1                                           |
| Hypercholesterolaemia                                  | 000499 | pig            | LDLR    | low density lipoprotein receptor                                                                 |
| Hyperekplexia (Startle disease)                        | 001594 | dog            | SLC6A5  | solute carrier family 6 (neurotransmitter transporter, glycine), member 5                        |
| Hyperkeratosis, epidermolytic                          | 001415 | dog            | KRT10   | keratin 10                                                                                       |
| Hyperlipidaemia                                        | 001160 | rabbit         | LDLR    | low density lipoprotein receptor                                                                 |
| Hyperlipoproteinaemia                                  | 001210 | cat            | LPL     | lipoprotein lipase                                                                               |
| Hypocatalasia                                          | 001138 | dog            | CAT     | catalase                                                                                         |
| Hypokalaemic periodic paralysis                        | 001759 | cat            | WNK4    | WNK lysine deficient protein kinase 4                                                            |
| Hypophosphatemic rickets, autosomal recessive, 1       | 001542 | sheep          | DMP1    | dentin matrix acidic phosphoprotein 1                                                            |
| Hypopigmentation syndrome, lethal                      | 001765 | sheep          | ETBR    | endothelin B receptor                                                                            |
| Hypothyroidism                                         | 000536 | cat, dog       | TPO     | thyroid peroxidase                                                                               |
| Hypotrichosis                                          | 000540 | cattle, sheep  | HEPHL1  | hephaestin-like 1                                                                                |
| Hypotrichosis with coat-colour dilution                | 001544 | cattle         | PMEL    | premelanosome protein                                                                            |
| Hypotrichosis, with whiskers short and curled          | 001583 | cat            | KRT71   | keratin 71                                                                                       |
| Hypotrophic axonopathy                                 | 000545 | Japanese quail | NEFL    | neurofilament, light polypeptide                                                                 |
| Ichthyosis                                             | 000546 | dog            | TGM1    | transglutaminase 1 (K polypeptide epidermal type I, protein-glutamine-gamma-glutamyltransferase) |
| Ichthyosis congenita                                   | 000547 | cattle         | ABCA12  | ATP-binding cassette, sub-family A (ABC1), member 12                                             |
| Ichthyosis, Golden Retriever                           | 001588 | dog            | PNPLA1  | patatin-like phospholipase domain containing 1                                                   |
| Improper coat                                          | 001498 | dog            | RSPO2   | R-spondin 2                                                                                      |
| Intestinal cobalamin malabsorption due to AMN mutation | 000565 | dog            | AMN     | amniotically expressed nuclear (mouse)                                                           |

|                                                                    |        |                            |          |                                                                    |
|--------------------------------------------------------------------|--------|----------------------------|----------|--------------------------------------------------------------------|
| Krabbe disease                                                     | 000578 | dog,<br>Rhesus<br>monkey   | GALC     | galactosylceramidase                                               |
| L-2-hydroxyglutaricacidemia                                        | 001371 | dog                        | L2HGDH   | L-2-hydroxyglutarate dehydrogenase                                 |
| Lavender foal syndrome                                             | 001501 | horse                      | MYO5A    | myosin VA (heavy chain 12, myosin)                                 |
| Leber congenital amaurosis (congenital stationary night blindness) | 001222 | dog                        | RPE65    | retinal pigment epithelium-specific protein 65kDa                  |
| Lens luxation                                                      | 000588 | dog                        | ADAMTS17 | ADAM metalloproteinase with thrombospondin type 1 motif, 17        |
| Lethal multi-organ developmental dysplasia                         | 001722 | cattle                     | KDM2B    | lysine (K)-specific demethylase 2B                                 |
| Leucodystrophy                                                     | 001130 | dog                        | CYTB     | cytochrome b                                                       |
| Leukemia, chronic monocytic                                        | 001573 | dog                        | BCR      | breakpoint cluster region                                          |
| Leukocyte adhesion deficiency, type I                              | 000595 | cattle, dog                | ITGB2    | integrin, beta 2 (complement component 3 receptor 3 and 4 subunit) |
| Leukocyte adhesion deficiency, type III                            | 001525 | dog                        | FERMT3   | fermitin family member 3                                           |
| Malignant hyperthermia                                             | 000621 | dog,<br>horse, pig         | RYR1     | ryanodine receptor 1 (skeletal)                                    |
| Mannosidosis, alpha                                                | 000625 | cattle, cat,<br>guinea pig | MAN2B1   | mannosidase, alpha, class 2B, member 1                             |
| Mannosidosis, beta                                                 | 000626 | cattle,<br>goat            | MANBA    | mannosidase, beta A, lysosomal                                     |
| Maple syrup urine disease                                          | 000627 | cattle                     | BCKDHA   | branched chain keto acid dehydrogenase E1, alpha polypeptide       |
| Marfan syndrome                                                    | 000628 | cattle                     | FBN1     | fibrillin 1                                                        |
| May-Hegglin anomaly                                                | 001608 | dog                        | MYH9     | myosin, heavy chain 9, non-muscle                                  |
| Meat quality (Rendement Napole)                                    | 001085 | pig                        | PRKAG3   | protein kinase, AMP-activated, gamma 3 non-catalytic subunit       |
| Megacolon                                                          | 000629 | horse                      | EDNRB    | endothelin receptor type B                                         |
| Membranoproliferative glomerulonephritis type II                   | 000636 | pig                        | CFH      | complement factor H                                                |

|                                                   |        |                  |          |                                                                      |
|---------------------------------------------------|--------|------------------|----------|----------------------------------------------------------------------|
| Metabolizer of a cognitive enhancer               | 001405 | dog              | CYP1A2   | cytochrome P450, family 1, subfamily A, polypeptide 2                |
| Microphthalmia                                    | 000649 | sheep            | PITX3    | paired-like homeodomain 3                                            |
| Motor neuron disease, lower                       | 000662 | sheep            | AGTPBP1  | ATP/GTP binding protein 1                                            |
| Mucopolidosis II                                  | 001248 | cat              | GNTPAB   | N-acetylglucosamine-1-phosphate transferase, alpha and beta subunits |
| Mucopolysaccharidosis I                           | 000664 | dog, cat         | IDUA     | iduronidase, alpha-L-                                                |
| Mucopolysaccharidosis IIIA                        | 001309 | dog              | SGSH     | N-sulfoglucosamine sulfohydrolase                                    |
| Mucopolysaccharidosis IIIB                        | 001342 | emu, dog, cattle | NAGLU    | N-acetylglucosaminidase, alpha                                       |
| Mucopolysaccharidosis IIID                        | 000665 | goat             | GNS      | glucosamine (N-acetyl)-6-sulfatase                                   |
| Mucopolysaccharidosis VI                          | 000666 | cat, dog         | ARSB     | arylsulfatase B                                                      |
| Mucopolysaccharidosis VII                         | 000667 | cat, dog         | GUSB     | glucuronidase, beta                                                  |
| Multidrug resistance 1                            | 001402 | dog              | ABCB1    | ATP-binding cassette, sub-family B (MDR/TAP), member 1               |
| Multifocal retinopathy 1                          | 001444 | dog              | BEST1    | bestrophin 1                                                         |
| Multifocal retinopathy 2                          | 001553 | dog              | BEST1    | bestrophin 1                                                         |
| Multifocal retinopathy 3                          | 001554 | dog              | BEST1    | bestrophin 1                                                         |
| Multiple ocular defects                           | 000733 | cattle, horse    | WFDC1    | WAP four-disulfide core domain 1                                     |
| Muscular dystrophy                                | 000679 | chicken          | WWP1     | WW domain containing E3 ubiquitin protein ligase 1                   |
| Muscular dystrophy, Duchenne type                 | 001081 | cat, dog         | DMD      | Duchenne muscular dystrophy                                          |
| Muscular hypertrophy (double muscling)            | 000683 | cattle, pig, dog | MSTN     | myostatin                                                            |
| Muscular hypertrophy (double muscling), Callipyge | 001354 | sheep            | DLK1     | delta-like 1 homolog (Drosophila)                                    |
| Muscular hypertrophy (double muscling), Texel     | 001426 | sheep            | MSTN     | myostatin                                                            |
| Musladin-Lueke syndrome                           | 001509 | dog              | ADAMTSL2 | ADAMTS-like 2                                                        |
| Myasthenic syndrome, congenital                   | 000685 | dog, cattle      | CHAT     | choline O-acetyltransferase                                          |
| Myoclonus                                         | 000689 | cattle           | GLRA1    | glycine receptor, alpha 1                                            |
| Myoclonus epilepsy of Lafora                      | 000690 | dog              | NHLRC1   | NHL repeat containing 1                                              |

|                                                              |        |                    |         |                                                                                     |
|--------------------------------------------------------------|--------|--------------------|---------|-------------------------------------------------------------------------------------|
| Myopathy of the diaphragmatic muscles                        | 001319 | cattle             | HSPA1A  | heat shock 70kDa protein 1A                                                         |
| Myopathy, centronuclear                                      | 001374 | dog                | PTPLA   | protein tyrosine phosphatase-like (proline instead of catalytic arginine), member A |
| Myotonia                                                     | 000698 | goat, dog, horse   | CLCN1   | chloride channel, voltage-sensitive 1                                               |
| Myotubular myopathy 1                                        | 001508 | dog                | MTM1    | myotubularin 1                                                                      |
| Naked neck                                                   | 000701 | chicken            | GDF7    | growth differentiation factor 7                                                     |
| Nanomelia                                                    | 000702 | chicken            | ACAN    | aggrecan                                                                            |
| Narcolepsy                                                   | 000703 | dog                | HCRTR2  | hypocretin (orexin) receptor 2                                                      |
| Neonatal encephalopathy with seizures                        | 001471 | dog                | ATF2    | activating transcription factor 2                                                   |
| Nephritis, X-linked                                          | 001112 | dog                | COL4A5  | collagen, type IV, alpha 5                                                          |
| Nephropathy                                                  | 000710 | dog                | COL4A4  | collagen, type IV, alpha 4                                                          |
| Neuroaxonal dystrophy                                        | 000715 | dog                | MFN2    | mitofusin 2                                                                         |
| Neuronal ceroid lipofuscinosis, 1                            | 001504 | dog                | PPT1    | palmitoyl-protein thioesterase 1                                                    |
| Neuronal ceroid lipofuscinosis, 10                           | 001505 | dog, sheep         | CTSD    | cathepsin D                                                                         |
| Neuronal ceroid lipofuscinosis, 2                            | 001472 | dog                | TPP1    | tripeptidyl peptidase I                                                             |
| Neuronal ceroid lipofuscinosis, 4A                           | 001503 | dog                | ARSG    | arylsulfatase G                                                                     |
| Neuronal ceroid lipofuscinosis, 5                            | 001482 | sheep, dog, cattle | CLN5    | ceroid-lipofuscinosis, neuronal 5                                                   |
| Neuronal ceroid lipofuscinosis, 6                            | 001443 | sheep, dog         | CLN6    | ceroid-lipofuscinosis, neuronal 6, late infantile, variant                          |
| Neuronal ceroid lipofuscinosis, 8                            | 001506 | dog                | CLN8    | ceroid-lipofuscinosis, neuronal 8 (epilepsy, progressive with mental retardation)   |
| Neuronal ceroid lipofuscinosis, adult-onset, Tibetan Terrier | 001552 | dog                | ATP13A2 | ATPase type 13A2                                                                    |
| Neutropenia, cyclic                                          | 000248 | dog                | AP3B1   | adaptor-related protein complex 3, beta 1 subunit                                   |
| Niemann-Pick disease, type C                                 | 000725 | cat                | NPC1    | Niemann-Pick disease, type C1                                                       |



|                                                    |        |                              |          |                                                                                                     |
|----------------------------------------------------|--------|------------------------------|----------|-----------------------------------------------------------------------------------------------------|
| Night blindness, congenital stationary             | 001486 | horse                        | TRPM1    | transient receptor potential cation channel, subfamily M, member 1                                  |
| Non-shivering thermiogenesis, absence of           | 001436 | pig                          | UCP1     | uncoupling protein 1                                                                                |
| Oculoskeletal dysplasia 1                          | 001522 | dog                          | COL9A3   | collagen, type IX, alpha 3                                                                          |
| Oculoskeletal dysplasia 2                          | 001523 | dog                          | COL9A2   | collagen, type IX, alpha 2                                                                          |
| Oligozeugodactyly                                  | 001612 | chicken                      | LMBR1    | limb region 1 homolog (mouse)                                                                       |
| Osteochondrodysplasia                              | 001315 | dog                          | SLC13A1  | solute carrier family 13 (sodium/sulfate symporters), member 1                                      |
| Osteogenesis imperfecta                            | 000754 | dog                          | COL1A2   | collagen, type I, alpha 2                                                                           |
| Osteogenesis imperfecta_Dachshund                  | 001483 | dog                          | SERPINH1 | serpin peptidase inhibitor, clade H (heat shock protein 47), member 1, (collagen binding protein 1) |
| Osteopetrosis                                      | 000755 | cattle,<br>Japanese<br>quail | SLC4A2   | solute carrier family 4, anion exchanger, member 2 (erythrocyte membrane protein band 3-like 1)     |
| Ovotesticular DSD (Disorder of Sexual Development) | 001230 | horse,<br>cattle             | SRY      | sex determining region Y                                                                            |
| Pancreatitis, hereditary                           | 001403 | dog                          | SPINK1   | serine peptidase inhibitor, Kazal type 1                                                            |
| Pea comb                                           | 000782 | chicken                      | SOX5     | SRY (sex determining region Y)-box 5                                                                |
| Periodic Fever Syndrome                            | 001561 | dog                          | HAS2     | hyaluronan synthase 2                                                                               |
| Periodic paralysis II                              | 000785 | horse                        | SCN4A    | sodium channel, voltage-gated, type IV, alpha subunit                                               |
| Persistent Mullerian duct syndrome                 | 000791 | dog                          | AMHR2    | anti-Mullerian hormone receptor, type II                                                            |
| Polled and multisystemic syndrome                  | 001736 | cattle                       | ZEB2     | zinc finger E-box binding homeobox 2                                                                |
| Polled/Horns                                       | 000483 | cattle,<br>goat,<br>sheep    | POLLED   | not yet named                                                                                       |
| Polycystic kidney disease                          | 000807 | cat, dog                     | PKD1     | polycystic kidney disease 1 (autosomal dominant)                                                    |
| Polycythemia                                       | 000809 | dog                          | JAK2     | Janus kinase 2                                                                                      |
| Polydactyly                                        | 000810 | cat,<br>chicken              | SHH      | sonic hedgehog                                                                                      |

|                                                              |        |                 |           |                                                                                    |
|--------------------------------------------------------------|--------|-----------------|-----------|------------------------------------------------------------------------------------|
| Polyneuropathy                                               | 001292 | dog             | NDRG1     | N-myc downstream regulated 1                                                       |
| Polysaccharide storage myopathy/Exertional rhabdomyolysis    | 001158 | horse           | GYS1      | glycogen synthase 1 (muscle)                                                       |
| Porphyria cutanea tarda                                      | 001176 | sheep           | urod      | uroporphyrinogen decarboxylase                                                     |
| Porphyria, acute intermittent                                | 001493 | cat             | HMBS      | hydroxymethylbilane synthase                                                       |
| Porphyria, congenital erythropoietic                         | 001175 | cat             | UROS      | uroporphyrinogen III synthase                                                      |
| Prekallikrein deficiency                                     | 000819 | dog             | KLKB1     | kallikrein B, plasma (Fletcher factor) 1                                           |
| Primary hyperoxaluria type I (Oxalosis I)                    | 001672 | dog             | AGXT      | alanine-glyoxylate aminotransferase                                                |
| Primary hyperoxaluria type II (Oxalosis II)                  | 000821 | cat             | GRHPR     | glyoxylate reductase/hydroxypyruvate reductase                                     |
| Progressive rod-cone degeneration                            | 001298 | dog             | PRCD      | progressive rod-cone degeneration                                                  |
| Protoporphyrin                                               | 000836 | cattle          | FECH      | ferrochelatase                                                                     |
| Pseudomyotonia, congenital                                   | 001464 | cattle          | ATP2A1    | ATPase, Ca <sup>++</sup> transporting, cardiac muscle, fast twitch 1               |
| Pyruvate dehydrogenase deficiency                            | 001406 | dog             | PDP1      | pyruvate dehydrogenase phosphatase catalytic subunit 1                             |
| Pyruvate kinase deficiency of erythrocyte                    | 000844 | dog, cat        | PKLR      | pyruvate kinase, liver and RBC                                                     |
| Reduced scale-3                                              | 001695 | Japanese medaka | edar      | ectodysplasin-A receptor                                                           |
| Renal cystadenocarcinoma and nodular dermatofibrosis         | 001335 | dog             | FLCN      | folliculin                                                                         |
| Renal dysplasia                                              | 001135 | cattle          | CLDN16    | claudin 16                                                                         |
| Resistance to avian sarcoma and leukosis viruses, subgroup A | 001299 | chicken         | CD320     | CD320 molecule                                                                     |
| Resistance to avian sarcoma and leukosis viruses, subgroup B | 001302 | chicken         | TNFRSF10B | tumor necrosis factor receptor superfamily, member 10b                             |
| Resistance to avian sarcoma and leukosis viruses, subgroup C | 001622 | chicken         | BTN1A1    | butyrophilin, subfamily 1, member A1                                               |
| Resistance to grass carp reovirus                            | 001725 | grass carp      | CiRIG-I   | ctenopharyngodon idella retinoic acid-inducible gene I                             |
| Resistance to myxovirus                                      | 001534 | chicken         | MX1       | myxovirus (influenza virus) resistance 1, interferon-inducible protein p78 (mouse) |

|                                                                                                         |        |            |          |                                                                                |
|---------------------------------------------------------------------------------------------------------|--------|------------|----------|--------------------------------------------------------------------------------|
| Resistance to oedema disease (F18 receptor)                                                             | 000862 | pig        | FUT1     | fucosyltransferase 1 (galactoside 2-alpha-L-fucosyltransferase, H blood group) |
| Resistance/susceptibility to lentivirus                                                                 | 001694 | sheep      | TMEM154  | transmembrane protein 154                                                      |
| Restricted ovulator                                                                                     | 000865 | chicken    | VLDLR    | very low density lipoprotein receptor                                          |
| Retinal degeneration I                                                                                  | 001245 | chicken    | GC1      | photoreceptor guanylate cyclase 1                                              |
| Retinal degeneration II                                                                                 | 001244 | cat        | CEP290   | centrosomal protein 290kDa                                                     |
| Retinal degeneration, fluoroquinolone-induced                                                           | 001707 | cat        | ABCG2    | ATP-binding cassette, sub-family G (WHITE), member 2                           |
| Retinal dysplasia and degeneration                                                                      | 001366 | chicken    | MPDZ     | multiple PDZ domain protein                                                    |
| Retinopathy globe enlarged                                                                              | 001368 | chicken    | GNB3     | guanine nucleotide binding protein (G protein), beta polypeptide 3             |
| Rex coat                                                                                                | 001566 | rabbit     | LIPH     | lipase, member H                                                               |
| Riboflavinuria                                                                                          | 000876 | chicken    | RTBDN    | retbindin                                                                      |
| Rod-cone dysplasia                                                                                      | 000881 | cat        | CRX      | cone-rod homeobox                                                              |
| Rod-cone dysplasia 1                                                                                    | 000882 | dog        | PDE6B    | phosphodiesterase 6B, cGMP-specific, rod, beta                                 |
| Rod-cone dysplasia 1a                                                                                   | 001669 | dog        | PDE6B    | phosphodiesterase 6B, cGMP-specific, rod, beta                                 |
| Rod-cone dysplasia 2                                                                                    | 001260 | dog        | RD3      | retinal degeneration 3                                                         |
| Rod-cone dysplasia 3                                                                                    | 001314 | dog        | PDE6A    | phosphodiesterase 6A, cGMP-specific, rod, alpha                                |
| Rose comb                                                                                               | 000884 | chicken    | MNR2     | homeodomain protein                                                            |
| Scaleless                                                                                               | 000889 | chicken    | FGF20    | fibroblast growth factor 20                                                    |
| Scurs, type 2                                                                                           | 001593 | cattle     | TWIST1   | twist homolog 1 (Drosophila)                                                   |
| Sensory ataxic neuropathy                                                                               | 001467 | dog        | tRNA-Tyr | tRNA                                                                           |
| Severe combined immunodeficiency disease, X-linked                                                      | 000899 | dog        | IL2RG    | interleukin 2 receptor, gamma                                                  |
| Severe combined immunodeficiency disease, autosomal                                                     | 000220 | horse, dog | DNAPK    | DNA-dependent protein kinase catalytic subunit                                 |
| Severe combined immunodeficiency disease, autosomal, T cell-negative, B cell-negative, NK cell-positive | 001574 | dog        | RAG1     | recombination activating gene 1                                                |

|                                            |        |                        |          |                                                                                                                   |
|--------------------------------------------|--------|------------------------|----------|-------------------------------------------------------------------------------------------------------------------|
| Sex determination                          | 001728 | torafugu               | Amhr2    | anti-Mullerian hormone type 2 receptor                                                                            |
| Silky/Silkie pigmentation (Fibromelanosis) | 001671 | chicken                | EDN3     | endothelin 3                                                                                                      |
| Skin colour, yellow                        | 001449 | chicken                | BCO2     | beta-carotene oxygenase 2                                                                                         |
| Sperm, short tail                          | 001334 | pig                    | SPEF2    | sperm flagellar 2                                                                                                 |
| Spermatogenic arrest                       | 001673 | pig                    | TEX14    | testis expressed 14                                                                                               |
| Spherocytosis                              | 001228 | cattle,<br>zebrafish   | SLC4A1   | solute carrier family 4, anion exchanger,<br>member 1 (erythrocyte membrane protein<br>band 3, Diego blood group) |
| Spinal dysmyelination                      | 001247 | cattle                 | SPAST    | spastin                                                                                                           |
| Spinal muscular atrophy                    | 000939 | cattle, cat            | KDSR     | 3-ketodihydrosphingosine reductase                                                                                |
| Spongiform encephalopathy                  | 000944 | sheep                  | PRNP     | prion protein                                                                                                     |
| Stress syndrome                            | 001685 | pig                    | DMD      | dystrophin                                                                                                        |
| Sweet taste, lack of                       | 001617 | cat, tiger,<br>cheetah | TAS1R2   | taste receptor, type 1, member 2<br>pseudogene                                                                    |
| Syndactyly (mule foot)                     | 000963 | cattle                 | LRP4     | low density lipoprotein receptor-related<br>protein 4                                                             |
| Tail, crooked                              | 001452 | cattle                 | MRC2     | mannose receptor, C type 2                                                                                        |
| Tail, short                                | 000975 | dog                    | T        | T, brachyury homolog (mouse)                                                                                      |
| Talpid-3                                   | 000979 | chicken                | KIAA0586 | KIAA0586                                                                                                          |
| Thrombasthenia                             | 001000 | dog, horse             | ITGA2B   | integrin, alpha 2b (platelet glycoprotein IIb of<br>IIb/IIIa complex, antigen CD41)                               |
| Thrombocytopaenia                          | 001001 | dog                    | TUBB1    | tubulin, beta 1 class VI                                                                                          |
| Thrombopathia                              | 001003 | dog, cattle            | RASGRP1  | RAS guanyl releasing protein 1 (calcium and<br>DAG-regulated)                                                     |
| Trapped Neutrophil Syndrome                | 001428 | dog                    | VPS13B   | vacuolar protein sorting 13 homolog B<br>(yeast)                                                                  |
| Tremor, X-linked                           | 000770 | rabbit,<br>dog         | PLP1     | proteolipid protein 1                                                                                             |

|                                                       |        |                    |         |                                                                     |
|-------------------------------------------------------|--------|--------------------|---------|---------------------------------------------------------------------|
| Tremor, high-frequency                                | 001200 | pig                | MYH7    | myosin, heavy chain 7, cardiac muscle, beta                         |
| Trimethylaminuria                                     | 001360 | cattle,<br>chicken | FMO3    | flavin containing monooxygenase 3                                   |
| Urolithiasis                                          | 001033 | dog                | SLC2A9  | solute carrier family 2 (facilitated glucose transporter), member 9 |
| Vitamin D-deficiency rickets, type I                  | 000837 | pig, cat           | CYP27B1 | 25-hydroxyvitamin D3 1alpha-hydroxylase                             |
| Vitamin D-deficiency rickets, type II                 | 001431 | dog                | VDR     | vitamin D (1,25- dihydroxyvitamin D3) receptor                      |
| Von Willebrand disease II                             | 001339 | dog                | VWF     | von Willebrand factor                                               |
| Von Willebrand disease III                            | 001058 | dog                | VWF     | von Willebrand factor                                               |
| Waardenburg syndrome, type IIA                        | 001401 | golden<br>hamster  | MITF    | microphthalmia-associated transcription factor                      |
| Wilson disease                                        | 001071 | dog                | COMMD1  | copper metabolism (Murr1) domain containing 1                       |
| X-linked PRA 1                                        | 000831 | dog                | RPGR    | retinitis pigmentosa GTPase regulator                               |
| X-linked PRA 2                                        | 001518 | dog                | RPGR    | retinitis pigmentosa GTPase regulator                               |
| XY Ovotesticular DSD (Disorder of Sexual Development) | 001709 | Japanese<br>medaka | DMRT1   | doublesex and mab-3 related transcription factor 1                  |
| Xanthinuria, type II                                  | 001819 | cattle             | MOCOS   | molybdenum cofactor sulfurase                                       |
| Yellow fat                                            | 001079 | sheep,<br>cattle   | BCO2    | beta-carotene oxygenase 2                                           |
