# Supplementary material for: Mutation discovery for Mendelian traits in non-laboratory animals: a review of achievements up to 2012
Source: PubMed Central journal article supplement — Anim Genet. 2013 Dec 26;45(2):157–70. doi: 10.1111/age.12103 (PMC4225684; doi:10.1111/age.12103), 2013-12-26
Supplement: age0045-0157-sd2.pdf [file age0045-0157-sd2.pdf]

**Table S2** Genes (listed alphabetically by symbol) in which mutations have been shown to result in Mendelian traits/disorders in non-rodent animals, up to the end of 2012. Further details (including references) for each entry are available at <http://omia.angis.org.au>. An up-to-date version of this table is available from the "Download" tab on the OMIA home page.

| Gene symbol | Gene name                                                  | Trait/disorder                                         | Species             | OMIA number      |
|-------------|------------------------------------------------------------|--------------------------------------------------------|---------------------|------------------|
| ABCA1       | ATP-binding cassette, sub-family A (ABC1), member 1        | Analphalipoproteinaemia                                | chicken             | 000042           |
| ABCA12      | ATP-binding cassette, sub-family A (ABC1), member 12       | Ichthyosis congenita                                   | cattle              | 000547           |
| ABCB1       | ATP-binding cassette, sub-family B (MDR/TAP), member 1     | Multidrug resistance 1                                 | dog                 | 001402           |
| ABCB4       | ATP-binding cassette, sub-family B (MDR/TAP), member 4     | Gallbladder mucoceles                                  | dog                 | 001524           |
| ABCG2       | ATP-binding cassette, sub-family G (WHITE), member 2       | Retinal degeneration, fluoroquinolone-induced          | cat                 | 001707           |
| ABO         |                                                            | Blood group system ABO                                 | Japanese macaque    | 001089           |
|             |                                                            | Blood group system ABO                                 | chimpanzee          | 001089           |
|             |                                                            | Blood group system ABO                                 | Rhesus monkey       | 001089           |
|             |                                                            | Blood group system ABO                                 | crab-eating macaque | 001089           |
|             |                                                            | Blood group system ABO                                 | agile gibbon        | 001089           |
|             |                                                            | Blood group system ABO                                 | common gibbon       | 001089           |
|             |                                                            | Blood group system ABO                                 | siamang             | 001089           |
| ACAN        | aggrecan                                                   | Nanomelia<br>Dwarfism, Dexter                          | chicken<br>cattle   | 000702<br>001271 |
| ADAM9       | ADAM metallopeptidase domain 9                             | Cone-rod dystrophy 3                                   | dog                 | 001520           |
| ADAMTS10    | ADAM metallopeptidase with thrombospondin type 1 motif, 10 | Glaucoma                                               | dog                 | 000411           |
| ADAMTS17    | ADAM metallopeptidase with thrombospondin type 1 motif, 17 | Lens luxation                                          | dog                 | 000588           |
| ADAMTS2     | ADAM metallopeptidase with thrombospondin type 1 motif, 2  | Ehlers-Danlos syndrome, type VII (Dermatosparaxis)     | cattle              | 000328           |
|             |                                                            | Ehlers-Danlos syndrome, type VII (Dermatosparaxis)     | sheep               | 000328           |
| ADAMTSL2    | ADAMTS-like 2                                              | Musladin-Lueke syndrome                                | dog                 | 001509           |
| AGL         | amylo-alpha-1, 6-glucosidase, 4-alpha-glucanotransferase   | Glycogen storage disease IIIa                          | dog                 | 001577           |
| AGTPBP1     | ATP/GTP binding protein 1                                  | Motor neuron disease, lower                            | sheep               | 000662           |
| AGXT        | alanine-glyoxylate aminotransferase                        | Primary hyperoxaluria type I (Oxalosis I)              | dog                 | 001672           |
| AMHR2       | anti-Mullerian hormone receptor, type II                   | Persistent Mullerian duct syndrome                     | dog                 | 000791           |
| AMN         | amniotless homolog (mouse)                                 | Intestinal cobalamin malabsorption due to AMN mutation | dog                 | 000565           |

|         |                                                                      |                                                              |                           |        |
|---------|----------------------------------------------------------------------|--------------------------------------------------------------|---------------------------|--------|
| AP3B1   | adaptor-related protein complex 3, beta 1 subunit                    | Neutropenia, cyclic                                          | dog                       | 000248 |
| APAF1   | apoptotic peptidase activating factor 1                              | Abortion due to haplotype HH1                                | cattle                    | 000001 |
| AR      | androgen receptor                                                    | Androgen insensitivity syndrome (AIS)                        | horse                     | 000991 |
| ARSB    | arylsulfatase B                                                      | Mucopolysaccharidosis VI                                     | cat                       | 000666 |
|         |                                                                      | Mucopolysaccharidosis VI                                     | dog                       | 000666 |
| ARSG    | arylsulfatase G                                                      | Neuronal ceroid lipofuscinosis, 4A                           | dog                       | 001503 |
| ASIP    | agouti signaling protein                                             | Coat colour, agouti                                          | horse                     | 000201 |
|         |                                                                      | Coat colour, agouti                                          | cattle                    | 000201 |
|         |                                                                      | Coat colour, agouti                                          | red fox                   | 000201 |
|         |                                                                      | Coat colour, agouti                                          | sheep                     | 000201 |
|         |                                                                      | Coat colour, agouti                                          | cat                       | 000201 |
|         |                                                                      | Coat colour, agouti                                          | rabbit                    | 000201 |
|         |                                                                      | Coat colour, agouti                                          | dog                       | 000201 |
|         |                                                                      | Feather colour, yellow                                       | Japanese quail            | 001602 |
|         |                                                                      | Coat colour, agouti                                          | North American deer mouse | 000201 |
|         |                                                                      | Coat colour, agouti                                          | leopard                   | 000201 |
|         |                                                                      | Coat colour, agouti                                          | Asiatic golden cat        | 000201 |
| ASS1    | argininosuccinate synthase 1                                         | Citrullinaemia                                               | cattle                    | 000194 |
| ATF2    | activating transcription factor 2                                    | Neonatal encephalopathy with seizures                        | dog                       | 001471 |
| ATP13A2 | ATPase type 13A2                                                     | Neuronal ceroid lipofuscinosis, adult-onset, Tibetan Terrier | dog                       | 001552 |
| ATP2A1  | ATPase, Ca <sup>++</sup> transporting, cardiac muscle, fast twitch 1 | Congenital muscular dystonia 1                               | cattle                    | 001450 |
|         |                                                                      | Pseudomyotonia, congenital                                   | cattle                    | 001464 |
| Amhr2   |                                                                      | Sex determination                                            | torafugu                  | 001728 |
| BCAN    | brevican                                                             | Episodic falling                                             | dog                       | 001592 |
| BCKDHA  | branched chain keto acid dehydrogenase E1, alpha polypeptide         | Maple syrup urine disease                                    | cattle                    | 000627 |
| BCO2    | beta-carotene oxygenase 2                                            | Yellow fat                                                   | sheep                     | 001079 |
|         |                                                                      | Skin colour, yellow                                          | chicken                   | 001449 |
|         |                                                                      | Yellow fat                                                   | cattle                    | 001079 |
| BCR     | breakpoint cluster region                                            | Leukemia, chronic monocytic                                  | dog                       | 001573 |
| BEST1   | bestrophin 1                                                         | Multifocal retinopathy 1                                     | dog                       | 001444 |
|         |                                                                      | Multifocal retinopathy 2                                     | dog                       | 001553 |
|         |                                                                      | Multifocal retinopathy 3                                     | dog                       | 001554 |
| BMP15   | bone morphogenetic protein 15                                        | Fecundity, Galway, FecX(G)                                   | sheep                     | 000384 |
|         |                                                                      | Fecundity, Inverdale, FecX(I)                                | sheep                     | 000386 |
|         |                                                                      | Fecundity, Hanna, FecX(H)                                    | sheep                     | 001350 |
|         |                                                                      | Fecundity, Lacaune, FecX(L)                                  | sheep                     | 001357 |
|         |                                                                      | Fecundity, Belclare, FecX(B)                                 | sheep                     | 001719 |
|         |                                                                      | Fecundity, Rasa Aragonesa, FecX(R)                           | sheep                     | 001800 |
| BMP3    | bone morphogenetic protein 3                                         | Brachycephaly                                                | dog                       | 001551 |

|        |                                                                                                   |                                                              |           |        |
|--------|---------------------------------------------------------------------------------------------------|--------------------------------------------------------------|-----------|--------|
| BMPR1B | bone morphogenetic protein receptor, type IB                                                      | Fecundity, Booroola, FecB(B)                                 | sheep     | 000383 |
|        |                                                                                                   | Fecundity, small tail Han                                    | sheep     | 001423 |
| BTN1A1 | butyrophilin, subfamily 1, member A1                                                              | Resistance to avian sarcoma and leukosis viruses, subgroup C | chicken   | 001622 |
| C3     | complement component 3                                                                            | C3 deficiency                                                | dog       | 000155 |
| CAT    | catalase                                                                                          | Hypocatalasia                                                | dog       | 001138 |
| CBD103 | beta-defensin 103                                                                                 | Coat colour, dominant black                                  | dog       | 001416 |
|        |                                                                                                   | Coat colour, dominant black                                  | gray wolf | 001416 |
|        |                                                                                                   | Coat colour, dominant black                                  | coyote    | 001416 |
| CCDC39 | coiled-coil domain containing 39                                                                  | Ciliary dyskinesia, primary                                  | dog       | 001540 |
| CCDC66 | coiled-coil domain containing 66                                                                  | Generalized PRA                                              | dog       | 001521 |
| CD320  | CD320 molecule                                                                                    | Resistance to avian sarcoma and leukosis viruses, subgroup A | chicken   | 001299 |
| CDKN2B | cyclin-dependent kinase inhibitor 2B (p15, inhibits CDK4)                                         | Barring                                                      | chicken   | 000102 |
| CEP290 | centrosomal protein 290kDa                                                                        | Retinal degeneration II                                      | cat       | 001244 |
| CFH    | complement factor H                                                                               | Membranoproliferative glomerulonephritis type II             | pig       | 000636 |
| CFTR   | cystic fibrosis transmembrane conductance regulator (ATP-binding cassette sub-family C, member 7) | Cystic fibrosis                                              | pig       | 001794 |
|        |                                                                                                   | Cystic fibrosis                                              | ferret    | 001794 |
| CHAT   | choline O-acetyltransferase                                                                       | Myasthenic syndrome, congenital                              | dog       | 000685 |
| CHRNE  | cholinergic receptor, nicotinic, epsilon (muscle)                                                 | Myasthenic syndrome, congenital                              | cattle    | 000685 |
| CLCN1  | chloride channel, voltage-sensitive 1                                                             | Myotonia                                                     | goat      | 000698 |
|        |                                                                                                   | Myotonia                                                     | dog       | 000698 |
|        |                                                                                                   | Myotonia                                                     | horse     | 000698 |
| CLDN16 | claudin 16                                                                                        | Renal dysplasia                                              | cattle    | 001135 |
| CLN5   | ceroid-lipofuscinosis, neuronal 5                                                                 | Neuronal ceroid lipofuscinosis, 5                            | sheep     | 001482 |
|        |                                                                                                   | Neuronal ceroid lipofuscinosis, 5                            | dog       | 001482 |
|        |                                                                                                   | Neuronal ceroid lipofuscinosis, 5                            | cattle    | 001482 |
| CLN6   | ceroid-lipofuscinosis, neuronal 6, late infantile, variant                                        | Neuronal ceroid lipofuscinosis, 6                            | sheep     | 001443 |
|        |                                                                                                   | Neuronal ceroid lipofuscinosis, 6                            | dog       | 001443 |
| CLN8   | ceroid-lipofuscinosis, neuronal 8 (epilepsy, progressive with mental retardation)                 | Neuronal ceroid lipofuscinosis, 8                            | dog       | 001506 |

|         |                                                                       |                                                                        |            |        |
|---------|-----------------------------------------------------------------------|------------------------------------------------------------------------|------------|--------|
| CMAH    | cytidine monophospho-N-acetylneuraminic acid hydroxylase              | Blood group system AB                                                  | cat        | 000119 |
| CNGA3   | cyclic nucleotide gated channel alpha 3                               | Achromatopsia-2                                                        | sheep      | 001481 |
| CNGB3   | cyclic nucleotide gated channel beta 3                                | Achromatopsia (cone degeneration, hemeralopia), AMAL                   | dog        | 001365 |
|         |                                                                       | Achromatopsia (cone degeneration, hemeralopia), GSPT                   | dog        | 001676 |
| COL10A1 | collagen, type X, alpha 1                                             | Dwarfism, Schmid metaphyseal chondrodysplasia                          | pig        | 001718 |
| COL1A2  | collagen, type I, alpha 2                                             | Osteogenesis imperfecta                                                | dog        | 000754 |
| COL4A4  | collagen, type IV, alpha 4                                            | Nephropathy                                                            | dog        | 000710 |
| COL4A5  | collagen, type IV, alpha 5                                            | Nephritis, X-linked                                                    | dog        | 001112 |
| COL7A1  | collagen, type VII, alpha 1                                           | Epidermolysis bullosa, dystrophic                                      | dog        | 000341 |
|         |                                                                       | Epidermolysis bullosa, dystrophic                                      | cattle     | 000341 |
| COL9A2  | collagen, type IX, alpha 2                                            | Oculoskeletal dysplasia 2                                              | dog        | 001523 |
| COL9A3  | collagen, type IX, alpha 3                                            | Oculoskeletal dysplasia 1                                              | dog        | 001522 |
| COMMD1  | copper metabolism (Murr1) domain containing 1                         | Wilson disease                                                         | dog        | 001071 |
| CRX     | cone-rod homeobox                                                     | Rod-cone dysplasia                                                     | cat        | 000881 |
| CSN1S1  | casein alpha s1                                                       | Casein, alpha-S1, reduced concentration                                | goat       | 000852 |
| CSN1S2  | casein alpha s2                                                       | Casein, alpha-S2, absence                                              | goat       | 001623 |
| CSN2    | casein beta                                                           | Casein, beta, absence of                                               | goat       | 001424 |
| CTSD    | cathepsin D                                                           | Neuronal ceroid lipofuscinosis, 10                                     | dog        | 001505 |
|         |                                                                       | Neuronal ceroid lipofuscinosis, 10                                     | sheep      | 001505 |
| CWC15   | CWC15 spliceosome-associated protein homolog ( <i>S. cerevisiae</i> ) | Abortion due to haplotype JH1                                          | cattle     | 001697 |
| CYP11A1 | cytochrome P450, family 11, subfamily A, polypeptide 1                | Adrenal hyperplasia, congenital                                        | rabbit     | 000017 |
| CYP11B1 | cytochrome P450, family 11, subfamily B, polypeptide 1                | Adrenal hyperplasia, congenital, due to 11-beta hydroxylase deficiency | cat        | 001661 |
| CYP19A1 | cytochrome P450, family 19, subfamily A, polypeptide 1                | Henny feathering                                                       | chicken    | 000452 |
| CYP1A2  | cytochrome P450, family 1, subfamily A, polypeptide 2                 | Metabolizer of a cognitive enhancer                                    | dog        | 001405 |
| CYP27B1 | 25-hydroxyvitamin D3 1alpha-hydroxylase                               | Vitamin D-deficiency rickets, type I                                   | pig        | 000837 |
|         |                                                                       | Vitamin D-deficiency rickets, type I                                   | cat        | 000837 |
| CYTB    | cytochrome b                                                          | Leucodystrophy                                                         | dog        | 001130 |
| ClRIG-I | ctenopharyngodon idella retinoic acid-inducible gene I                | Resistance to grass carp reovirus                                      | grass carp | 001725 |
| DLK1    | delta-like 1 homolog ( <i>Drosophila</i> )                            | Muscular hypertrophy (double muscling), Callipyge                      | sheep      | 001354 |

|        |                                                                   |                                                                    |                 |        |
|--------|-------------------------------------------------------------------|--------------------------------------------------------------------|-----------------|--------|
| DMD    | Duchenne muscular dystrophy                                       | Muscular dystrophy, Duchenne type                                  | cat             | 001081 |
|        |                                                                   | Muscular dystrophy, Duchenne type                                  | dog             | 001081 |
|        |                                                                   | Stress syndrome                                                    | pig             | 001685 |
| DMP1   | dentin matrix acidic phosphoprotein 1                             | Hypophosphatemic rickets, autosomal recessive, 1                   | sheep           | 001542 |
| DMRT1  | doublesex and mab-3 related transcription factor 1                | XY Ovotesticular DSD (Disorder of Sexual Development)              | Japanese medaka | 001709 |
| DNAPK  | DNA-dependent protein kinase catalytic subunit                    | Severe combined immunodeficiency disease, autosomal                | horse           | 000220 |
| DNM1   | dynamain 1                                                        | Exercise-induced collapse                                          | dog             | 001466 |
| DPYS   | dihydropyrimidinase                                               | Dihydropyrimidinase deficiency                                     | cat             | 001776 |
| EDA    | ectodysplasin A                                                   | Anhidrotic ectodermal dysplasia                                    | cattle          | 000543 |
|        |                                                                   | Anhidrotic ectodermal dysplasia                                    | dog             | 000543 |
| EDN3   | endothelin 3                                                      | Silky/Silkie pigmentation (Fibromelanosis)                         | chicken         | 001671 |
| EDNRB  | endothelin receptor type B                                        | Megacolon                                                          | horse           | 000629 |
| EDNRB2 | endothelin receptor B subtype 2                                   | Feather colour, panda/dotted white                                 | Japanese quail  | 000375 |
| EPYC   | epiphycan                                                         | Ehlers-Danlos syndrome, Holstein variant                           | cattle          | 001716 |
| ETBR   | endothelin B receptor                                             | Hypopigmentation syndrome, lethal                                  | sheep           | 001765 |
| EVC2   | Ellis van Creveld syndrome 2                                      | Chondrodysplasia                                                   | cattle          | 000187 |
| F11    | coagulation factor XI                                             | Factor XI deficiency                                               | cattle          | 000363 |
|        |                                                                   | Factor XI deficiency                                               | dog             | 000363 |
| F7     | coagulation factor VII (serum prothrombin conversion accelerator) | Factor VII deficiency                                              | dog             | 000361 |
| F8     | coagulation factor VIII, procoagulant component                   | Haemophilia A                                                      | dog             | 000437 |
|        |                                                                   | Haemophilia A                                                      | sheep           | 000437 |
|        |                                                                   | Haemophilia A                                                      | cattle          | 000437 |
| F9     | coagulation factor IX                                             | Haemophilia B                                                      | cat             | 000438 |
|        |                                                                   | Haemophilia B                                                      | dog             | 000438 |
| FAM83H | family with sequence similarity 83, member H                      | Congenital keratoconjunctivitis sicca and ichthyosiform dermatosis | dog             | 001683 |
| FANCI  | Fanconi anemia, complementation group I                           | Brachyspina                                                        | cattle          | 000151 |
| FBN1   | fibrillin 1                                                       | Marfan syndrome                                                    | cattle          | 000628 |
| FECH   | ferrochelatase                                                    | Protoporphyrria                                                    | cattle          | 000836 |
| FERMT3 | fermitin family member 3                                          | Leukocyte adhesion deficiency, type III                            | dog             | 001525 |
| FGF20  | fibroblast growth factor 20                                       | Scaleless                                                          | chicken         | 000889 |
| FGF4   | fibroblast growth factor 4                                        | Chondrodysplasia                                                   | dog             | 000187 |

|        |                                                                                |                                                      |               |        |
|--------|--------------------------------------------------------------------------------|------------------------------------------------------|---------------|--------|
| FGF5   | fibroblast growth factor 5                                                     | Dermoid sinus                                        | dog           | 000272 |
|        |                                                                                | Hair length                                          | cat           | 000439 |
| FGFR3  | fibroblast growth factor receptor 3                                            | Hair length                                          | dog           | 000439 |
|        |                                                                                | Chondrodysplasia, Spider lamb                        | sheep         | 001703 |
| FLCN   | folliculin                                                                     | Renal cystadenocarcinoma and nodular dermatofibrosis | dog           | 001335 |
| FMO3   | flavin containing monooxygenase 3                                              | Trimethylaminuria                                    | cattle        | 001360 |
| FMO6P  | flavin containing monooxygenase 6 pseudogene                                   | Trimethylaminuria                                    | chicken       | 001360 |
| FOXI3  | forkhead box I3                                                                | Ectodermal dysplasia                                 | dog           | 000323 |
| FUCA1  | fucosidase, alpha-L- 1, tissue                                                 | Fucosidosis, alpha                                   | dog           | 000396 |
| FUT1   | fucosyltransferase 1 (galactoside 2-alpha-L-fucosyltransferase, H blood group) | Resistance to oedema disease (F18 receptor)          | pig           | 000862 |
| G6PC   | glucose-6-phosphatase, catalytic subunit                                       | Glycogen storage disease Ia                          | dog           | 000418 |
| GAA    | glucosidase, alpha; acid                                                       | Glycogen storage disease II                          | cattle        | 000419 |
| GALC   | galactosylceramidase                                                           | Krabbe disease                                       | dog           | 000578 |
|        |                                                                                | Krabbe disease                                       | Rhesus monkey | 000578 |
| GBA    | glucosidase, beta, acid                                                        | Gaucher disease, type I                              | sheep         | 000405 |
| GBE1   | glucan (1,4-alpha-), branching enzyme 1                                        | Glycogen storage disease IV                          | cat           | 000420 |
|        |                                                                                | Glycogen storage disease IV                          | horse         | 000420 |
| GC1    | photoreceptor guanylate cyclase 1                                              | Retinal degeneration I                               | chicken       | 001245 |
| GDF7   | growth differentiation factor 7                                                | Naked neck                                           | chicken       | 000701 |
| GDF9   | growth differentiation factor 9                                                | Fecundity, Thoka, FecG(T)                            | sheep         | 000385 |
|        |                                                                                | Fecundity, Embrapa, FecG(E)                          | sheep         | 001559 |
|        |                                                                                | Fecundity, Norwegian White Sheep                     | sheep         | 001763 |
|        |                                                                                | Fecundity, High fertility, FecG(H)                   | sheep         | 001801 |
| GGTA1  | glycoprotein, alpha-galactosyltransferase 1                                    | Blood group system ABO                               | pig           | 001089 |
| GH1    | growth hormone 1                                                               | Dwarfism, growth-hormone deficiency                  | cattle        | 001473 |
| GLB1   | galactosidase, beta 1                                                          | Gangliosidosis, GM1                                  | cat           | 000402 |
|        |                                                                                | Gangliosidosis, GM1                                  | dog           | 000402 |
|        |                                                                                | Gangliosidosis, GM1                                  | sheep         | 000402 |
| GLRA1  | glycine receptor, alpha 1                                                      | Myoclonus                                            | cattle        | 000689 |
| GM2A   | GM2 ganglioside activator                                                      | Gangliosidosis, GM2, GM2A deficiency                 | cat           | 001427 |
| GNB3   | guanine nucleotide binding protein (G protein), beta polypeptide 3             | Retinopathy globe enlarged                           | chicken       | 001368 |
| GNTTAB | N-acetylglucosamine-1-phosphate transferase, alpha and beta subunits           | Mucopolipidosis II                                   | cat           | 001248 |
| GNS    | glucosamine (N-acetyl)-6-sulfatase                                             | Mucopolysaccharidosis IIID                           | goat          | 000665 |
| GRHPR  | glyoxylate reductase/hydroxypyruvate reductase                                 | Primary hyperoxaluria type II (Oxalosis II)          | cat           | 000821 |
| GRM1   | glutamate receptor, metabotropic 1                                             | Ataxia, cerebellar                                   | dog           | 000078 |
| GUSB   | glucuronidase, beta                                                            | Mucopolysaccharidosis VII                            | cat           | 000667 |
|        |                                                                                | Mucopolysaccharidosis VII                            | dog           | 000667 |

|          |                                                                                  |                                                           |                   |        |
|----------|----------------------------------------------------------------------------------|-----------------------------------------------------------|-------------------|--------|
| GYS1     | glycogen synthase 1 (muscle)                                                     | Polysaccharide storage myopathy/Exertional rhabdomyolysis | horse             | 001158 |
| HAS2     | hyaluronan synthase 2                                                            | Periodic Fever Syndrome                                   | dog               | 001561 |
| HCRTR2   | hypocretin (orexin) receptor 2                                                   | Narcolepsy                                                | dog               | 000703 |
| HEPHL1   | hephaestin-like 1                                                                | Hypotrichosis                                             | cattle            | 000540 |
| HEXA     | Hexosaminidase A (alpha polypeptide)                                             | Gangliosidosis, GM2, type I                               | American flamingo | 001461 |
| HEXB     | hexosaminidase B (beta polypeptide)                                              | Gangliosidosis, GM2, type I                               | sheep             | 001461 |
|          |                                                                                  | Gangliosidosis, GM2, type II                              | cat               | 001462 |
|          |                                                                                  | Gangliosidosis, GM2, type II                              | dog               | 001462 |
| HMBS     | hydroxymethylbilane synthase                                                     | Porphyria, acute intermittent                             | cat               | 001493 |
| HR       | hairless homolog (mouse)                                                         | Hypotrichosis                                             | sheep             | 000540 |
|          |                                                                                  | Atrichia with papular lesions                             | Rhesus monkey     | 001348 |
| HSF4     | heat shock transcription factor 4                                                | Cataract, early onset                                     | dog               | 001758 |
| HSPA1A   | heat shock 70kDa protein 1A                                                      | Myopathy of the diaphragmatic muscles                     | cattle            | 001319 |
| IDUA     | iduronidase, alpha-L-                                                            | Mucopolysaccharidosis I                                   | dog               | 000664 |
|          |                                                                                  | Mucopolysaccharidosis I                                   | cat               | 000664 |
| IL2RG    | interleukin 2 receptor, gamma                                                    | Severe combined immunodeficiency disease, X-linked        | dog               | 000899 |
| ITGA2B   | integrin, alpha 2b (platelet glycoprotein IIb of IIb/IIIa complex, antigen CD41) | Thrombasthenia                                            | dog               | 001000 |
|          |                                                                                  | Thrombasthenia                                            | horse             | 001000 |
| ITGB2    | integrin, beta 2 (complement component 3 receptor 3 and 4 subunit)               | Leukocyte adhesion deficiency, type I                     | cattle            | 000595 |
|          |                                                                                  | Leukocyte adhesion deficiency, type I                     | dog               | 000595 |
| JAK2     | Janus kinase 2                                                                   | Polycythemia                                              | dog               | 000809 |
| KDM2B    | lysine (K)-specific demethylase 2B                                               | Lethal multi-organ developmental dysplasia                | cattle            | 001722 |
| KDSR     | 3-ketodihydrosphingosine reductase                                               | Spinal muscular atrophy                                   | cattle            | 000939 |
| KIAA0586 | KIAA0586                                                                         | Talpid-3                                                  | chicken           | 000979 |
| KIT      | v-kit Hardy-Zuckerman 4 feline sarcoma viral oncogene homolog                    | Coat colour, dominant white                               | pig               | 000209 |
|          |                                                                                  | Coat colour, dominant white                               | cattle            | 000209 |
|          |                                                                                  | Coat colour, dominant white                               | horse             | 000209 |
|          |                                                                                  | Coat colour, roan                                         | pig               | 001216 |
|          |                                                                                  | Gastrointestinal stromal tumor                            | dog               | 001516 |
|          |                                                                                  | Coat colour, colour-sided                                 | cattle            | 001576 |
|          |                                                                                  | Feet, white                                               | cat               | 001580 |
|          |                                                                                  | Coat colour, white spotting, due to KIT                   | dog               | 001737 |
|          |                                                                                  | Coat colour, patch                                        | pig               | 001743 |
|          |                                                                                  | Coat colour, white belt, due to KIT                       | pig               | 001745 |

|              |                                                                         |                                               |               |        |
|--------------|-------------------------------------------------------------------------|-----------------------------------------------|---------------|--------|
| KITLG        | KIT ligand                                                              | Coat colour, roan                             | cattle        | 001216 |
| KLKB1        | kallikrein B, plasma (Fletcher factor) 1                                | Prekallikrein deficiency                      | dog           | 000819 |
| KRT10        | keratin 10                                                              | Hyperkeratosis, epidermolytic                 | dog           | 001415 |
| KRT5         | keratin 5                                                               | Epidermolysis bullosa                         | cattle        | 000340 |
| KRT71        | keratin 71                                                              | Curly coat                                    | dog           | 000245 |
|              |                                                                         | Curly coat, Devon rex                         | cat           | 001581 |
|              |                                                                         | Hypotrichosis, with whiskers short and curled | cat           | 001583 |
| KRT75        | keratin 75                                                              | Frizzle                                       | chicken       | 000394 |
| L2HGDH       | L-2-hydroxyglutarate dehydrogenase                                      | L-2-hydroxyglutaricacidemia                   | dog           | 001371 |
| LAMA3        | laminin, alpha 3                                                        | Epidermolysis bullosa, junctionalis, LAMA3    | dog           | 001677 |
|              |                                                                         | Epidermolysis bullosa, junctionalis, LAMA3    | horse         | 001677 |
| LAMC2        | laminin, gamma 2                                                        | Epidermolysis bullosa, junctionalis, LAMC2    | sheep         | 001678 |
|              |                                                                         | Epidermolysis bullosa, junctionalis, LAMC2    | horse         | 001678 |
| LDLR         | low density lipoprotein receptor                                        | Hypercholesterolaemia                         | pig           | 000499 |
|              |                                                                         | Hyperlipidaemia                               | rabbit        | 001160 |
| LGI2         | leucine-rich repeat LGI family, member 2                                | Epilepsy, benign familial juvenile            | dog           | 001596 |
| LHX3         | LIM homeobox 3                                                          | Dwarfism, pituitary                           | dog           | 000307 |
| LIPH         | lipase, member H                                                        | Rex coat                                      | rabbit        | 001566 |
| LIX1         | Lix1 homolog (chicken)                                                  | Spinal muscular atrophy                       | cat           | 000939 |
| LMBR1        | limb region 1 homolog (mouse)                                           | Oligozeugodactyly                             | chicken       | 001612 |
| LOC100147177 | doublesex- and mab-3-related transcription factor 3-like                | Gaitedness                                    | horse         | 001715 |
| LOC430486    | similar to Ca <sup>2+</sup> regulator SV2A                              | Epilepsy                                      | chicken       | 000344 |
| LPL          | lipoprotein lipase                                                      | Hyperlipoproteinaemia                         | cat           | 001210 |
| LRP4         | low density lipoprotein receptor-related protein 4                      | Syndactyly (mule foot)                        | cattle        | 000963 |
| LYST         | lysosomal trafficking regulator                                         | Chediak-Higashi syndrome                      | cattle        | 000185 |
|              |                                                                         | Chediak-Higashi syndrome                      | American mink | 000185 |
| MAN2B1       | mannosidase, alpha, class 2B, member 1                                  | Mannosidosis, alpha                           | cattle        | 000625 |
|              |                                                                         | Mannosidosis, alpha                           | cat           | 000625 |
| MANBA        | mannosidase, beta A, lysosomal                                          | Mannosidosis, beta                            | cattle        | 000626 |
|              |                                                                         | Mannosidosis, beta                            | goat          | 000626 |
| MC1R         | melanocortin 1 receptor (alpha melanocyte stimulating hormone receptor) | Feather colour, extended black                | chicken       | 000374 |
|              |                                                                         | Coat colour, extension                        | cattle        | 001199 |
|              |                                                                         | Coat colour, extension                        | dog           | 001199 |
|              |                                                                         | Coat colour, extension                        | horse         | 001199 |
|              |                                                                         | Coat colour, extension                        | red fox       | 001199 |
|              |                                                                         | Coat colour, extension                        | pig           | 001199 |
|              |                                                                         | Coat colour, extension                        | sheep         | 001199 |
|              |                                                                         | Coat colour, extension                        | jaguar        | 001199 |
|              |                                                                         | Coat colour, extension                        | jaguarundi    | 001199 |



|       |                                                                    |                                                  |                         |        |
|-------|--------------------------------------------------------------------|--------------------------------------------------|-------------------------|--------|
|       |                                                                    | Coat colour, extension                           | American black bear     | 001199 |
|       |                                                                    | Feather colour, extended brown                   | Japanese quail          | 001435 |
|       |                                                                    | Coat colour, extension                           | woolly mammoth          | 001199 |
|       |                                                                    | Feather colour, extended black                   | red-footed booby        | 000374 |
|       |                                                                    | Feather colour, extended black                   | Bananaquit              | 000374 |
|       |                                                                    | Coat colour, extension                           | cat                     | 001199 |
|       |                                                                    | Coat colour, extension                           | rabbit                  | 001199 |
|       |                                                                    | Coat colour, extension                           | Arctic fox              | 001199 |
|       |                                                                    | Coat colour, extension                           | gray squirrel           | 001199 |
|       |                                                                    | Coat colour, extension                           | little striped whiptail | 001199 |
|       |                                                                    | Coat colour, extension                           | water buffalo           | 001199 |
|       |                                                                    | Feather colour, bronze                           | turkey                  | 001494 |
|       |                                                                    | Coat colour, grizzle                             | dog                     | 001495 |
|       |                                                                    | Coat colour, extension                           | yak                     | 001199 |
|       |                                                                    | Coat colour, melanistic mask                     | dog                     | 001590 |
|       |                                                                    | Feather colour, extended black                   | helmeted guineafowl     | 000374 |
|       |                                                                    | Feather colour, extended black                   | gyrfalcon               | 000374 |
|       |                                                                    | Feather colour, extended black                   | Lesser snow goose       | 000374 |
|       |                                                                    | Feather colour, extended black                   |                         | 000374 |
|       |                                                                    | Feather colour, extended black                   |                         | 000374 |
|       |                                                                    | Feather colour, extended black                   | brown booby             | 000374 |
| MFN2  | mitofusin 2                                                        | Axonopathy                                       | cattle                  | 001106 |
|       |                                                                    | Neuroaxonal dystrophy                            | dog                     | 000715 |
| MIMT1 | MER1 repeat containing imprinted transcript 1 (non-protein coding) | Abortion and stillbirth due to mutation in MIMT1 | cattle                  | 001565 |
| MITF  | microphthalmia-associated transcription factor                     | Feather colour, silver                           | Japanese quail          | 000915 |
|       |                                                                    | Osteopetrosis                                    | Japanese quail          | 000755 |
|       |                                                                    | Waardenburg syndrome, type IIA                   | golden hamster          | 001401 |
|       |                                                                    | Coat colour, white spotting                      | dog                     | 000214 |
|       |                                                                    | Coat colour, white spotting                      | cattle                  | 000214 |
|       |                                                                    | Dominant white with bilateral deafness           | cattle                  | 001680 |
|       |                                                                    | Coat colour, white spotting                      | horse                   | 000214 |
|       |                                                                    | Coat colour, macchiato                           | horse                   | 001688 |

|        |                                                                                    |                                               |                   |        |
|--------|------------------------------------------------------------------------------------|-----------------------------------------------|-------------------|--------|
| MLPH   | melanophilin                                                                       | Deafness                                      | pig               | 000259 |
|        |                                                                                    | Alopecia, colour mutant                       | dog               | 000031 |
|        |                                                                                    | Coat colour, dilute                           | cat               | 000206 |
|        |                                                                                    | Feather colour, lavender                      | chicken           | 001445 |
|        |                                                                                    | Feather colour, lavender                      | Japanese quail    | 001445 |
| MNR2   | homeodomain protein                                                                | Rose comb                                     | chicken           | 000884 |
| MOCOS  | molybdenum cofactor sulfurase                                                      | Xanthinuria, type II                          | cattle            | 001819 |
| MOCS1  | molybdenum cofactor synthesis 1                                                    | Arachnomelia, BTA23                           | cattle            | 001541 |
| MPDZ   | multiple PDZ domain protein                                                        | Retinal dysplasia and degeneration            | chicken           | 001366 |
| MRC2   | mannose receptor, C type 2                                                         | Tail, crooked                                 | cattle            | 001452 |
| MSTN   | myostatin                                                                          | Muscular hypertrophy (double muscling)        | cattle            | 000683 |
|        |                                                                                    | Muscular hypertrophy (double muscling)        | pig               | 000683 |
|        |                                                                                    | Muscular hypertrophy (double muscling), Texel | sheep             | 001426 |
|        |                                                                                    | Muscular hypertrophy (double muscling)        | dog               | 000683 |
| MTM1   | myotubularin 1                                                                     | Myotubular myopathy 1                         | dog               | 001508 |
| MUTYH  | mutY homolog (E. coli)                                                             | Cerebellar abiotrophy                         | horse             | 000175 |
| MX1    | myxovirus (influenza virus) resistance 1, interferon-inducible protein p78 (mouse) | Resistance to myxovirus                       | chicken           | 001534 |
| MYBPC3 | myosin binding protein C, cardiac                                                  | Cardiomyopathy, hypertrophic                  | cat               | 000515 |
| MYH7   | myosin, heavy chain 7, cardiac muscle, beta                                        | Tremor, high-frequency                        | pig               | 001200 |
| MYH9   | myosin, heavy chain 9, non-muscle                                                  | May-Hegglin anomaly                           | dog               | 001608 |
| MYO5A  | myosin VA (heavy chain 12, myosin)                                                 | Lavender foal syndrome                        | horse             | 001501 |
| Man2b1 | mannosidase 2, alpha B1                                                            | Mannosidosis, alpha                           | guinea pig        | 000625 |
| Mc1r   |                                                                                    | Coat colour, extension                        | rock pocket mouse | 001199 |
|        |                                                                                    | Coat colour, extension                        | oldfield mouse    | 001199 |
|        |                                                                                    | Coat colour, extension                        |                   | 001199 |
|        |                                                                                    | Coat colour, extension                        |                   | 001199 |
| NAGLU  | N-acetylglucosaminidase, alpha                                                     | Mucopolysaccharidosis IIIB                    | emu               | 001342 |
|        |                                                                                    | Mucopolysaccharidosis IIIB                    | dog               | 001342 |
|        |                                                                                    | Mucopolysaccharidosis IIIB                    | cattle            | 001342 |
|        |                                                                                    |                                               |                   |        |
| NDRG1  | N-myc downstream regulated 1                                                       | Polyneuropathy                                | dog               | 001292 |
| NEFL   | neurofilament, light polypeptide                                                   | Hypotrophic axonopathy                        | Japanese quail    | 000545 |
| NHEJ1  | nonhomologous end-joining factor 1                                                 | Collie eye anomaly                            | dog               | 000218 |
| NHLRC1 | NHL repeat containing 1                                                            | Myoclonus epilepsy of Lafora                  | dog               | 000690 |
| NPC1   | Niemann-Pick disease, type C1                                                      | Niemann-Pick disease, type C                  | cat               | 000725 |
| NPHP4  | nephronophthisis 4                                                                 | Cone-rod dystrophy, Standard                  | dog               | 001455 |
|        |                                                                                    | Wire-haired Dachshund                         |                   |        |
| OCA2   |                                                                                    | Coat colour, albinism                         |                   | 000202 |
| OPA3   | optic atrophy 3 (autosomal recessive, with chorea and spastic paraplegia)          | Cardiomyopathy, dilated                       | cattle            | 000162 |

|          |                                                              |                                                     |         |        |
|----------|--------------------------------------------------------------|-----------------------------------------------------|---------|--------|
| P2RY12   | purinergic receptor P2Y, G-protein coupled, 12               | Bleeding disorder due to P2RY12 defect              | dog     | 001564 |
| PAEP     | progestagen-associated endometrial protein                   | Beta-lactoglobulin, aberrant low expression         | cattle  | 001437 |
| PDE6A    | phosphodiesterase 6A, cGMP-specific, rod, alpha              | Rod-cone dysplasia 3                                | dog     | 001314 |
| PDE6B    | phosphodiesterase 6B, cGMP-specific, rod, beta               | Rod-cone dysplasia 1                                | dog     | 000882 |
|          |                                                              | Rod-cone dysplasia 1a                               | dog     | 001669 |
| PK4      | pyruvate dehydrogenase kinase, isozyme 4                     | Cardiomyopathy, dilated                             | dog     | 000162 |
| PDP1     | pyruvate dehydrogenase phosphatase catalytic subunit 1       | Pyruvate dehydrogenase deficiency                   | dog     | 001406 |
| PFKM     | phosphofructokinase, muscle                                  | Glycogen storage disease VII                        | dog     | 000421 |
| PISRT1   | polled intersex syndrome regulated transcript 1              | Polled/Horns                                        | goat    | 000483 |
| PITX3    | paired-like homeodomain 3                                    | Microphthalmia                                      | sheep   | 000649 |
| PKD1     | polycystic kidney disease 1 (autosomal dominant)             | Polycystic kidney disease                           | cat     | 000807 |
|          |                                                              | Polycystic kidney disease                           | dog     | 000807 |
| PKLR     | pyruvate kinase, liver and RBC                               | Pyruvate kinase deficiency of erythrocyte           | dog     | 000844 |
|          |                                                              | Pyruvate kinase deficiency of erythrocyte           | cat     | 000844 |
| PLP1     | proteolipid protein 1                                        | Tremor, X-linked                                    | rabbit  | 000770 |
|          |                                                              | Tremor, X-linked                                    | dog     | 000770 |
| PMEL     | premelanosome protein                                        | Coat colour, merle                                  | dog     | 000211 |
|          |                                                              | Feather colour, dominant white                      | chicken | 000373 |
|          |                                                              | Hypotrichosis with coat-colour dilution             | cattle  | 001544 |
|          |                                                              | Coat colour, dilution                               | cattle  | 001545 |
| PMEL17   | melanocyte protein 17 precursor                              | Coat colour, silver                                 | horse   | 001438 |
|          |                                                              | Multiple ocular defects                             | horse   | 000733 |
| PNPLA1   | patatin-like phospholipase domain containing 1               | Ichthyosis, Golden Retriever                        | dog     | 001588 |
| POLLED   | not yet named                                                | Polled/Horns                                        | cattle  | 000483 |
| PPARD    | peroxisome proliferator-activated receptor delta             | Ear size                                            | pig     | 001579 |
| PPIB     | peptidylprolyl isomerase B (cyclophilin B)                   | Ehlers-Danlos syndrome                              | horse   | 000327 |
| PPP1R13L | protein phosphatase 1, regulatory subunit 13 like            | Cardiomyopathy and woolly haircoat syndrome         | cattle  | 000161 |
| PPT1     | palmitoyl-protein thioesterase 1                             | Neuronal ceroid lipofuscinosis, 1                   | dog     | 001504 |
| PRCD     | progressive rod-cone degeneration                            | Progressive rod-cone degeneration                   | dog     | 001298 |
| PRKAG3   | protein kinase, AMP-activated, gamma 3 non-catalytic subunit | Meat quality (Rendement Napole)                     | pig     | 001085 |
| PRKDC    | protein kinase, DNA-activated, catalytic polypeptide         | Severe combined immunodeficiency disease, autosomal | dog     | 000220 |

|          |                                                                                                     |                                                                                                         |                |        |
|----------|-----------------------------------------------------------------------------------------------------|---------------------------------------------------------------------------------------------------------|----------------|--------|
| PRKG2    | protein kinase, cGMP-dependent, type II                                                             | Dwarfism, Angus                                                                                         | cattle         | 001485 |
| PRLR     | prolactin receptor                                                                                  | Feathering, Z-linked                                                                                    | chicken        | 000380 |
| PRNP     | prion protein                                                                                       | Spongiform encephalopathy                                                                               | sheep          | 000944 |
| PSMB7    | proteasome (prosome, macropain) subunit, beta type, 7                                               | Coat colour, harlequin                                                                                  | dog            | 001454 |
| PTEN     | phosphatase and tensin homolog                                                                      | Colorectal hamartomatous polyposis and ganglioneuromatosis                                              | dog            | 001515 |
| PTPLA    | protein tyrosine phosphatase-like (proline instead of catalytic arginine), member A                 | Myopathy, centronuclear                                                                                 | dog            | 001374 |
| PYGM     | phosphorylase, glycogen, muscle                                                                     | Glycogen storage disease V                                                                              | cattle         | 001139 |
|          |                                                                                                     | Glycogen storage disease V                                                                              | sheep          | 001139 |
| RAG1     | recombination activating gene 1                                                                     | Severe combined immunodeficiency disease, autosomal, T cell-negative, B cell-negative, NK cell-positive | dog            | 001574 |
| RASGRP1  | RAS guanyl releasing protein 1 (calcium and DAG-regulated)                                          | Thrombopathia                                                                                           | dog            | 001003 |
| RASGRP2  | RAS guanyl releasing protein 2 (calcium and DAG-regulated)                                          | Thrombopathia                                                                                           | cattle         | 001003 |
| RD3      | retinal degeneration 3                                                                              | Rod-cone dysplasia 2                                                                                    | dog            | 001260 |
| RHO      | rhodopsin                                                                                           | Autosomal dominant PRA                                                                                  | dog            | 001346 |
| RNF11    | ring finger protein 11                                                                              | Dwarfism, proportionate, with inflammatory lesions                                                      | cattle         | 001686 |
| RPE65    | retinal pigment epithelium-specific protein 65kDa                                                   | Leber congenital amaurosis (congenital stationary night blindness)                                      | dog            | 001222 |
| RPGR     | retinitis pigmentosa GTPase regulator                                                               | X-linked PRA 1                                                                                          | dog            | 000831 |
|          |                                                                                                     | X-linked PRA 2                                                                                          | dog            | 001518 |
| RPGRIP1  | retinitis pigmentosa GTPase regulator interacting protein 1                                         | Cone-rod dystrophy 4                                                                                    | dog            | 001432 |
| RSPO2    | R-spondin 2                                                                                         | Improper coat                                                                                           | dog            | 001498 |
|          |                                                                                                     | Furnishings (moustache and eyebrows)                                                                    | dog            | 001531 |
| RTBDN    | retbindin                                                                                           | Riboflavinuria                                                                                          | chicken        | 000876 |
| RXFP2    | relaxin/insulin-like family peptide receptor 2                                                      | Polled/Horns                                                                                            | sheep          | 000483 |
| RYR1     | ryanodine receptor 1 (skeletal)                                                                     | Malignant hyperthermia                                                                                  | dog            | 000621 |
|          |                                                                                                     | Malignant hyperthermia                                                                                  | horse          | 000621 |
|          |                                                                                                     | Malignant hyperthermia                                                                                  | pig            | 000621 |
| SCN4A    | sodium channel, voltage-gated, type IV, alpha subunit                                               | Periodic paralysis II                                                                                   | horse          | 000785 |
| SEL1L    | sel-1 suppressor of lin-12-like (C. elegans)                                                        | Ataxia, cerebellar, progressive early-onset                                                             | dog            | 001692 |
| SERPINH1 | serpin peptidase inhibitor, clade H (heat shock protein 47), member 1, (collagen binding protein 1) | Osteogenesis imperfecta_Dachshund                                                                       | dog            | 001483 |
| SGCD     |                                                                                                     | Cardiomyopathy, hypertrophic                                                                            | golden hamster | 000515 |

|         |                                                                                                                                                          |                                                 |                |        |
|---------|----------------------------------------------------------------------------------------------------------------------------------------------------------|-------------------------------------------------|----------------|--------|
|         |                                                                                                                                                          | Cardiomyopathy, dilated                         | golden hamster | 000162 |
| SGSH    | N-sulfoglucosamine sulfohydrolase                                                                                                                        | Mucopolysaccharidosis IIIA                      | dog            | 001309 |
| SHH     | sonic hedgehog                                                                                                                                           | Polydactyly                                     | cat            | 000810 |
|         |                                                                                                                                                          | Polydactyly                                     | chicken        | 000810 |
| SLC13A1 | solute carrier family 13 (sodium/sulfate symporters), member 1                                                                                           | Chondrodysplasia, Texel                         | sheep          | 001400 |
|         |                                                                                                                                                          | Osteochondrodysplasia                           | dog            | 001315 |
| SLC2A9  | solute carrier family 2 (facilitated glucose transporter), member 9                                                                                      | Urolithiasis                                    | dog            | 001033 |
| SLC35A3 | solute carrier family 35 (UDP-N-acetylglucosamine (UDP-GlcNAc) transporter), member A3                                                                   | Complex vertebral malformation                  | cattle         | 001340 |
| SLC36A1 | solute carrier family 36 (proton/amino acid symporter), member 1                                                                                         | Coat colour, champagne                          | horse          | 001263 |
| SLC37A2 | solute carrier family 37 (glycerol-3-phosphate transporter), member 2                                                                                    | Abortion due to haplotype MH2                   | cattle         | 001828 |
| SLC39A4 | solute carrier family 39 (zinc transporter), member 4                                                                                                    | Acrodermatitis enteropathica                    | cattle         | 000593 |
| SLC3A1  | solute carrier family 3 (cystine, dibasic and neutral amino acid transporters, activator of cystine, dibasic and neutral amino acid transport), member 1 | Cystinuria, type A                              | dog            | 000256 |
| SLC45A2 | solute carrier family 45, member 2                                                                                                                       | Feather colour, albinism, sex-linked, imperfect | chicken        | 000370 |
|         |                                                                                                                                                          | Feather colour, silver                          | chicken        | 000915 |
|         |                                                                                                                                                          | Coat colour, cream dilution                     | horse          | 001344 |
|         |                                                                                                                                                          | Feather colour, albinism, sex-linked, imperfect | Japanese quail | 000370 |
| SLC4A1  | solute carrier family 4, anion exchanger, member 1 (erythrocyte membrane protein band 3, Diego blood group)                                              | Spherocytosis                                   | cattle         | 001228 |
| SLC4A2  | solute carrier family 4, anion exchanger, member 2 (erythrocyte membrane protein band 3-like 1)                                                          | Osteopetrosis                                   | cattle         | 000755 |
| SLC4A3  | solute carrier family 4, anion exchanger, member 3                                                                                                       | Golden Retriever PRA 1                          | dog            | 001572 |
| SLC5A3  | solute carrier family 5 (sodium/myo-inositol cotransporter), member 3                                                                                    | Foal immunodeficiency syndrome                  | horse          | 001578 |
| SLC6A5  | solute carrier family 6 (neurotransmitter transporter, glycine), member 5                                                                                | Congenital muscular dystonia 2                  | cattle         | 001451 |
|         |                                                                                                                                                          | Hyperekplexia (Startle disease)                 | dog            | 001594 |
| SOD1    | superoxide dismutase 1, soluble                                                                                                                          | Degenerative myelopathy                         | dog            | 000263 |

|           |                                                                                                  |                                                              |               |        |
|-----------|--------------------------------------------------------------------------------------------------|--------------------------------------------------------------|---------------|--------|
| SOX10     | SRY (sex determining region Y)-box 10                                                            | Feather colour, dark brown                                   | chicken       | 001569 |
| SOX5      | SRY (sex determining region Y)-box 5                                                             | Pea comb                                                     | chicken       | 000782 |
| SPAST     | spastin                                                                                          | Spinal dysmyelination                                        | cattle        | 001247 |
| SPEF2     | sperm flagellar 2                                                                                | Sperm, short tail                                            | pig           | 001334 |
| SPINK1    | serine peptidase inhibitor, Kazal type 1                                                         | Pancreatitis, hereditary                                     | dog           | 001403 |
| SPP2      | secreted phosphoprotein 2, 24kDa                                                                 | Dwarfism, sex-linked                                         | chicken       | 000309 |
| SPTB      | spectrin, beta, erythrocytic                                                                     | Elliptocytosis                                               | dog           | 001318 |
| SPTBN2    | spectrin, beta, non-erythrocytic 2                                                               | Cerebellar abiotrophy                                        | dog           | 000175 |
| SRY       | sex determining region Y                                                                         | Ovotesticular DSD (Disorder of Sexual Development)           | horse         | 001230 |
|           |                                                                                                  | Ovotesticular DSD (Disorder of Sexual Development)           | cattle        | 001230 |
| STK38L    | serine/threonine kinase 38 like                                                                  | Early retinal degeneration                                   | dog           | 001297 |
| STRN      | striatin, calmodulin binding protein                                                             | Arrhythmogenic right ventricular cardiomyopathy              | dog           | 000878 |
| STX17     | syntaxin 17                                                                                      | Coat colour, grey/gray                                       | horse         | 001356 |
| SUOX      | sulfite oxidase                                                                                  | Arachnomelia, BTA5                                           | cattle        | 000059 |
| T         | T, brachyury homolog (mouse)                                                                     | Tail, short                                                  | dog           | 000975 |
| TAS1R2    | taste receptor, type 1, member 2 pseudogene                                                      | Sweet taste, lack of                                         | cat           | 001617 |
|           |                                                                                                  | Sweet taste, lack of                                         | tiger         | 001617 |
|           |                                                                                                  | Sweet taste, lack of                                         | cheetah       | 001617 |
| TEX14     | testis expressed 14                                                                              | Spermatogenic arrest                                         | pig           | 001673 |
| TG        | thyroglobulin                                                                                    | Goitre, familial                                             | cattle        | 000424 |
|           |                                                                                                  | Goitre, familial                                             | goat          | 000424 |
| TGM1      | transglutaminase 1 (K polypeptide epidermal type I, protein-glutamine-gamma-glutamyltransferase) | Ichthyosis                                                   | dog           | 000546 |
| TMEM154   | transmembrane protein 154                                                                        | Resistance/susceptibility to lentivirus                      | sheep         | 001694 |
| TNFRSF10B | tumor necrosis factor receptor superfamily, member 10b                                           | Resistance to avian sarcoma and leukosis viruses, subgroup B | chicken       | 001302 |
| TNNT2     | troponin T type 2 (cardiac)                                                                      | Cardiomyopathy, dilated                                      | turkey        | 000162 |
| TPO       | thyroid peroxidase                                                                               | Hypothyroidism                                               | cat           | 000536 |
|           |                                                                                                  | Hypothyroidism                                               | dog           | 000536 |
| TPP1      | tripeptidyl peptidase I                                                                          | Neuronal ceroid lipofuscinosis, 2                            | dog           | 001472 |
| TRPM1     | transient receptor potential cation channel, subfamily M, member 1                               | Coat colour, appaloosa                                       | horse         | 001341 |
|           |                                                                                                  | Night blindness, congenital stationary                       | horse         | 001486 |
| TUBB1     | tubulin, beta 1 class VI                                                                         | Thrombocytopaenia                                            | dog           | 001001 |
| TWIST1    | twist homolog 1 (Drosophila)                                                                     | Scurs, type 2                                                | cattle        | 001593 |
| TYR       | tyrosinase (oculocutaneous albinism IA)                                                          | Coat colour, albinism                                        | cat           | 000202 |
|           |                                                                                                  | Coat colour, albinism                                        | cattle        | 000202 |
|           |                                                                                                  | Coat colour, albinism                                        | rabbit        | 000202 |
|           |                                                                                                  | Feather colour, albinism                                     | chicken       | 000369 |
|           |                                                                                                  | Coat colour, albinism                                        | water buffalo | 000202 |
|           |                                                                                                  | Feather colour, recessive white                              | chicken       | 001252 |
|           |                                                                                                  | Coat colour, albinism                                        | American mink | 000202 |

|          |                                                    |                                               |                 |        |
|----------|----------------------------------------------------|-----------------------------------------------|-----------------|--------|
|          |                                                    | Coat colour, Himalayan                        | American mink   | 001497 |
|          |                                                    | Coat colour, albinism                         | humpback whale  | 000202 |
|          |                                                    | Coat colour, albinism                         | ferret          | 000202 |
| TYRP1    | tyrosinase-related protein 1                       | Coat colour, brown                            | cattle          | 001249 |
|          |                                                    | Feather colour, roux                          | Japanese quail  | 001322 |
|          |                                                    | Coat colour, brown                            | dog             | 001249 |
|          |                                                    | Coat colour, brown                            | cat             | 001249 |
|          |                                                    | Coat colour, brown                            | sheep           | 001249 |
|          |                                                    | Coat colour, brown                            | pig             | 001249 |
| Taqpep   | transmembrane aminopeptidase Q                     | Coat colour, tabby                            | cat             | 001429 |
|          |                                                    | Coat colour, king                             | cheetah         | 001721 |
| UCP1     | uncoupling protein 1                               | Non-shivering thermiogenesis, absence of      | pig             | 001436 |
| UGT1A6   | UDP-glucuronosyltransferase 1A6                    | Deficient acetaminophen glucuronidation       | cat             | 001586 |
| UMPS     | uridine monophosphate synthetase                   | Deficiency of uridine monophosphate synthase  | cattle          | 000262 |
| UROS     | uroporphyrinogen III synthase                      | Porphyria, congenital erythropoietic          | cat             | 001175 |
| VDR      | vitamin D (1,25- dihydroxyvitamin D3) receptor     | Vitamin D-deficiency rickets, type II         | dog             | 001431 |
| VLDLR    | very low density lipoprotein receptor              | Restricted ovulator                           | chicken         | 000865 |
| VPS13B   | vacuolar protein sorting 13 homolog B (yeast)      | Trapped Neutrophil Syndrome                   | dog             | 001428 |
| VWF      | von Willebrand factor                              | Von Willebrand disease III                    | dog             | 001058 |
|          |                                                    | Von Willebrand disease II                     | dog             | 001339 |
| WFDC1    | WAP four-disulfide core domain 1                   | Multiple ocular defects                       | cattle          | 000733 |
| WNK4     | WNK lysine deficient protein kinase 4              | Hypokalaemic periodic paralysis               | cat             | 001759 |
| WWP1     | WW domain containing E3 ubiquitin protein ligase 1 | Muscular dystrophy                            | chicken         | 000679 |
| ZEB2     | zinc finger E-box binding homeobox 2               | Polled and multisystemic syndrome             | cattle          | 001736 |
| edar     | ectodysplasin-A receptor                           | Reduced scale-3                               | Japanese medaka | 001695 |
| pmelb    | premelanosome protein b                            | Coat colour, silver                           | zebrafish       | 001438 |
| slc24a5  | solute carrier family 24, member 5                 | Coat colour, golden                           | zebrafish       | 001433 |
| slc45a2  | membrane-associated transporter protein B          | Coat colour, albinism, oculocutaneous type IV | Japanese medaka | 001821 |
| sptb     | spectrin, beta, erythrocytic                       | Spherocytosis                                 | zebrafish       | 001228 |
| tRNA-Tyr | tRNA                                               | Sensory ataxic neuropathy                     | dog             | 001467 |
| tyr      | tyrosinase                                         | Coat colour, albinism                         | Japanese medaka | 000202 |
| urod     | uroporphyrinogen decarboxylase                     | Porphyria cutanea tarda                       | sheep           | 001176 |
